# Supplementary material
Source: MDPI journal article supplement (https://www.mdpi.com/2306-5338/4/2/21)
Supplement: s1 [file s1]

## Sheet: Fig.4
	Temperature [C]
	1st TRT		2nd TRT
t [hr]	Inlet	Outlet	Inlet	Outlet	v [L/min]
0	11.73	11.8	11.91	11.78	20.1
0.0166667	11.72	11.98	11.91	11.97	20.1
0.0333333	11.71	12.16	11.92	12.16	19.9
0.05	11.7	12.35	11.92	12.35	20
0.0666667	11.74	12.55	11.92	12.54	20.1
0.0833333	11.8	12.79	11.94	12.72	20.1
0.1	11.89	13.05	12.02	12.97	20.1
0.116667	11.98	13.33	12.1	13.23	20
0.133333	12.07	13.6	12.19	13.5	20.1
0.15	12.17	13.88	12.29	13.77	19.9
0.166667	12.29	14.19	12.39	14.05	20
0.183333	12.42	14.5	12.52	14.35	20.1
0.2	12.56	14.82	12.65	14.66	20
0.216667	12.7	15.14	12.8	14.98	20
0.233333	12.84	15.47	12.95	15.3	20
0.25	13	15.81	13.1	15.63	20
0.266667	13.16	16.16	13.25	15.96	19.9
0.283333	13.33	16.52	13.42	16.31	20.1
0.3	13.51	16.88	13.59	16.66	19.9
0.316667	13.69	17.24	13.76	17.02	20
0.333333	13.88	17.43	13.95	17.38	20.1
0.35	14.08	17.63	14.14	17.71	20
0.366667	14.29	17.83	14.34	17.89	20.1
0.383333	14.5	18.04	14.53	18.07	20
0.4	14.7	18.24	14.73	18.27	20
0.416667	14.88	18.44	14.94	18.47	19.9
0.433333	15.02	18.59	15.13	18.67	20.1
0.45	15.16	18.74	15.27	18.82	20
0.466667	15.3	18.88	15.41	18.95	19.9
0.483333	15.43	19.02	15.53	19.07	20
0.5	15.56	19.16	15.65	19.2	20
0.516667	15.68	19.28	15.78	19.33	19.9
0.533333	15.79	19.39	15.88	19.44	19.9
0.55	15.89	19.5	15.98	19.54	20.1
0.566667	15.99	19.6	16.07	19.64	20
0.583333	16.08	19.7	16.16	19.73	20
0.6	16.17	19.8	16.24	19.82	20
0.616667	16.26	19.89	16.33	19.9	20.1
0.633333	16.34	19.98	16.4	19.98	20.1
0.65	16.42	20.06	16.46	20.05	19.9
0.666667	16.5	20.15	16.53	20.12	20
0.683333	16.57	20.23	16.58	20.18	20.1
0.7	16.64	20.3	16.64	20.24	20
0.716667	16.71	20.38	16.71	20.32	20
0.733333	16.78	20.45	16.77	20.38	19.9
0.75	16.85	20.53	16.83	20.44	20
0.766667	16.92	20.6	16.88	20.5	20.1
0.783333	16.98	20.67	16.93	20.56	19.9
0.8	17.04	20.73	16.99	20.62	20.1
0.816667	17.1	20.79	17.04	20.67	20.1
0.833333	17.16	20.85	17.09	20.73	20
0.85	17.21	20.91	17.14	20.79	19.9
0.866667	17.27	20.97	17.19	20.84	19.9
0.883333	17.31	21.02	17.24	20.89	20
0.9	17.37	21.08	17.3	20.94	19.8
0.916667	17.41	21.13	17.34	21	20
0.933333	17.46	21.19	17.4	21.05	19.9
0.95	17.51	21.24	17.46	21.11	20
0.966667	17.56	21.29	17.51	21.16	20.1
0.983333	17.6	21.34	17.56	21.21	20
1	17.65	21.39	17.62	21.27	19.9
1.01667	17.69	21.43	17.67	21.33	20
1.03333	17.74	21.48	17.72	21.38	20
1.05	17.78	21.53	17.77	21.44	19.9
1.06667	17.82	21.58	17.82	21.48	20
1.08333	17.87	21.62	17.86	21.54	19.9
1.1	17.9	21.66	17.91	21.59	19.9
1.11667	17.94	21.7	17.95	21.64	20
1.13333	17.99	21.75	18	21.7	20
1.15	18.02	21.79	18.04	21.74	19.9
1.16667	18.06	21.84	18.08	21.8	20
1.18333	18.09	21.87	18.12	21.84	20
1.2	18.13	21.91	18.16	21.89	20
1.21667	18.17	21.95	18.21	21.94	20
1.23333	18.21	21.99	18.24	21.98	19.9
1.25	18.25	22.02	18.29	22.03	20
1.26667	18.29	22.06	18.33	22.07	20
1.28333	18.33	22.1	18.36	22.11	20.1
1.3	18.37	22.15	18.39	22.15	19.9
1.31667	18.4	22.18	18.43	22.19	20
1.33333	18.44	22.22	18.46	22.24	20
1.35	18.47	22.25	18.49	22.27	20
1.36667	18.5	22.3	18.53	22.31	20
1.38333	18.53	22.33	18.56	22.34	20
1.4	18.56	22.36	18.59	22.38	19.9
1.41667	18.6	22.4	18.63	22.42	19.9
1.43333	18.62	22.43	18.65	22.45	20
1.45	18.65	22.46	18.69	22.48	20.2
1.46667	18.69	22.5	18.74	22.52	20.1
1.48333	18.72	22.53	18.77	22.55	19.9
1.5	18.75	22.56	18.8	22.59	20
1.51667	18.79	22.6	18.84	22.62	20.1
1.53333	18.82	22.63	18.87	22.65	19.9
1.55	18.85	22.66	18.9	22.68	20.1
1.56667	18.89	22.7	18.94	22.72	19.9
1.58333	18.91	22.73	18.97	22.75	20
1.6	18.95	22.76	19	22.78	19.9
1.61667	18.97	22.8	19.04	22.81	20
1.63333	19	22.83	19.06	22.84	20
1.65	19.03	22.86	19.1	22.87	20.1
1.66667	19.06	22.89	19.13	22.9	19.9
1.68333	19.09	22.91	19.16	22.94	20.1
1.7	19.11	22.95	19.19	22.97	20
1.71667	19.14	22.97	19.23	23	20
1.73333	19.18	23	19.25	23.03	19.9
1.75	19.21	23.04	19.28	23.05	20.1
1.76667	19.24	23.06	19.31	23.07	20.2
1.78333	19.27	23.09	19.34	23.1	19.9
1.8	19.3	23.12	19.36	23.12	19.9
1.81667	19.33	23.15	19.38	23.14	19.9
1.83333	19.36	23.17	19.42	23.17	20
1.85	19.38	23.2	19.44	23.19	20
1.86667	19.41	23.22	19.47	23.22	19.9
1.88333	19.43	23.25	19.5	23.24	19.9
1.9	19.46	23.28	19.52	23.27	20.1
1.91667	19.48	23.3	19.54	23.29	20.2
1.93333	19.5	23.32	19.57	23.31	20.1
1.95	19.53	23.35	19.6	23.34	20
1.96667	19.56	23.38	19.62	23.36	20
1.98333	19.58	23.4	19.65	23.38	20
2	19.6	23.42	19.67	23.41	20
2.01667	19.63	23.45	19.69	23.43	19.9
2.03333	19.65	23.47	19.71	23.45	20
2.05	19.68	23.49	19.73	23.46	20.1
2.06667	19.7	23.51	19.75	23.48	20
2.08333	19.72	23.53	19.77	23.5	20.1
2.1	19.74	23.55	19.8	23.52	20
2.11667	19.76	23.57	19.82	23.54	20.1
2.13333	19.79	23.59	19.84	23.56	20
2.15	19.8	23.6	19.85	23.58	20.1
2.16667	19.82	23.61	19.86	23.6	20
2.18333	19.84	23.63	19.88	23.61	20.2
2.2	19.86	23.65	19.9	23.64	20
2.21667	19.88	23.66	19.92	23.65	20.1
2.23333	19.9	23.68	19.94	23.67	20.1
2.25	19.92	23.7	19.95	23.68	20
2.26667	19.94	23.71	19.96	23.7	19.9
2.28333	19.96	23.73	19.98	23.72	20.1
2.3	19.98	23.75	19.99	23.73	20
2.31667	20	23.76	20.01	23.75	20
2.33333	20.02	23.77	20.03	23.77	20.1
2.35	20.04	23.79	20.04	23.78	20
2.36667	20.06	23.8	20.06	23.8	20
2.38333	20.07	23.8	20.08	23.81	20
2.4	20.09	23.82	20.1	23.84	19.9
2.41667	20.1	23.83	20.11	23.85	20
2.43333	20.12	23.85	20.13	23.87	20.1
2.45	20.14	23.87	20.14	23.9	20
2.46667	20.15	23.89	20.16	23.92	19.9
2.48333	20.17	23.9	20.18	23.94	20.1
2.5	20.19	23.92	20.2	23.95	19.9
2.51667	20.2	23.95	20.22	23.97	20.1
2.53333	20.22	23.96	20.24	23.99	20.1
2.55	20.24	23.98	20.26	24	20.1
2.56667	20.26	24	20.27	24.02	19.9
2.58333	20.27	24.01	20.29	24.03	19.9
2.6	20.29	24.03	20.31	24.05	20
2.61667	20.3	24.04	20.33	24.07	19.9
2.63333	20.32	24.06	20.34	24.09	19.9
2.65	20.34	24.08	20.36	24.1	20
2.66667	20.36	24.1	20.38	24.12	19.9
2.68333	20.38	24.12	20.39	24.13	20.1
2.7	20.4	24.14	20.41	24.14	20.3
2.71667	20.42	24.17	20.43	24.16	20
2.73333	20.44	24.19	20.44	24.18	20
2.75	20.46	24.21	20.45	24.19	20.1
2.76667	20.48	24.23	20.47	24.2	19.9
2.78333	20.5	24.26	20.49	24.21	20
2.8	20.52	24.28	20.5	24.22	20
2.81667	20.54	24.3	20.51	24.24	20.1
2.83333	20.56	24.32	20.53	24.25	19.9
2.85	20.58	24.33	20.54	24.26	20
2.86667	20.6	24.35	20.55	24.28	20
2.88333	20.61	24.38	20.56	24.29	20
2.9	20.63	24.4	20.57	24.31	20
2.91667	20.65	24.42	20.59	24.33	19.9
2.93333	20.68	24.44	20.6	24.35	19.9
2.95	20.7	24.46	20.62	24.36	20.1
2.96667	20.72	24.49	20.63	24.38	20
2.98333	20.73	24.5	20.65	24.4	20
3	20.75	24.52	20.66	24.42	20
3.01667	20.77	24.53	20.68	24.44	20
3.03333	20.79	24.54	20.7	24.45	20
3.05	20.8	24.56	20.71	24.47	19.9
3.06667	20.81	24.58	20.73	24.48	19.9
3.08333	20.83	24.59	20.74	24.5	19.9
3.1	20.85	24.61	20.75	24.52	19.9
3.11667	20.86	24.62	20.77	24.54	20
3.13333	20.88	24.64	20.79	24.56	19.9
3.15	20.9	24.65	20.8	24.58	19.9
3.16667	20.91	24.66	20.82	24.6	20.1
3.18333	20.93	24.67	20.84	24.61	19.9
3.2	20.94	24.69	20.85	24.63	19.9
3.21667	20.95	24.7	20.87	24.64	20
3.23333	20.96	24.7	20.89	24.66	20
3.25	20.97	24.7	20.91	24.68	20
3.26667	20.99	24.71	20.92	24.69	20
3.28333	21	24.72	20.94	24.71	20.1
3.3	21	24.73	20.95	24.72	20.1
3.31667	21.01	24.73	20.96	24.74	20
3.33333	21.02	24.74	20.97	24.75	20
3.35	21.03	24.75	20.98	24.76	20.1
3.36667	21.05	24.76	20.99	24.77	20
3.38333	21.06	24.77	21.01	24.79	20
3.4	21.07	24.78	21.02	24.8	20
3.41667	21.08	24.79	21.04	24.82	19.9
3.43333	21.09	24.8	21.06	24.84	20.1
3.45	21.1	24.81	21.08	24.85	20
3.46667	21.11	24.81	21.09	24.86	19.9
3.48333	21.11	24.82	21.1	24.87	19.9
3.5	21.13	24.83	21.11	24.88	20
3.51667	21.13	24.84	21.13	24.9	20
3.53333	21.14	24.86	21.14	24.92	20.1
3.55	21.16	24.88	21.15	24.93	20.1
3.56667	21.18	24.9	21.16	24.94	20.1
3.58333	21.19	24.91	21.17	24.94	19.9
3.6	21.2	24.93	21.19	24.96	20
3.61667	21.22	24.95	21.2	24.97	20
3.63333	21.23	24.97	21.21	24.98	20.1
3.65	21.25	24.99	21.22	24.99	20
3.66667	21.26	25	21.24	25	20.1
3.68333	21.28	25.02	21.25	25.02	19.9
3.7	21.29	25.04	21.26	25.03	20
3.71667	21.3	25.05	21.28	25.04	20
3.73333	21.31	25.06	21.29	25.05	19.9
3.75	21.32	25.08	21.3	25.06	20
3.76667	21.34	25.1	21.3	25.07	19.9
3.78333	21.35	25.11	21.31	25.08	20.2
3.8	21.37	25.13	21.32	25.09	20
3.81667	21.38	25.15	21.33	25.1	20
3.83333	21.4	25.17	21.34	25.11	20
3.85	21.41	25.19	21.35	25.13	20
3.86667	21.43	25.21	21.36	25.14	20
3.88333	21.44	25.22	21.37	25.14	20.1
3.9	21.45	25.24	21.38	25.14	20
3.91667	21.47	25.25	21.39	25.16	20
3.93333	21.49	25.27	21.4	25.17	20
3.95	21.5	25.29	21.4	25.18	20
3.96667	21.52	25.3	21.42	25.19	20
3.98333	21.53	25.31	21.42	25.21	19.9
4	21.55	25.32	21.44	25.22	20
4.01667	21.57	25.34	21.45	25.24	20
4.03333	21.58	25.35	21.46	25.24	20.1
4.05	21.6	25.37	21.47	25.25	20.1
4.06667	21.62	25.4	21.48	25.26	20.1
4.08333	21.64	25.42	21.49	25.28	19.9
4.1	21.65	25.43	21.5	25.29	20
4.11667	21.67	25.45	21.52	25.31	20.1
4.13333	21.68	25.47	21.53	25.33	20
4.15	21.7	25.48	21.54	25.35	19.9
4.16667	21.71	25.49	21.56	25.36	20.1
4.18333	21.72	25.5	21.57	25.37	20
4.2	21.73	25.5	21.58	25.38	19.9
4.21667	21.75	25.51	21.6	25.4	20
4.23333	21.76	25.52	21.62	25.42	19.9
4.25	21.77	25.52	21.63	25.43	20
4.26667	21.78	25.53	21.64	25.44	20
4.28333	21.79	25.53	21.65	25.46	20
4.3	21.8	25.54	21.67	25.47	20.1
4.31667	21.81	25.55	21.68	25.49	20.1
4.33333	21.81	25.55	21.7	25.5	20
4.35	21.82	25.56	21.71	25.52	20
4.36667	21.82	25.57	21.72	25.52	20
4.38333	21.84	25.57	21.73	25.53	19.9
4.4	21.84	25.57	21.74	25.54	20
4.41667	21.85	25.58	21.75	25.56	20.1
4.43333	21.86	25.58	21.77	25.57	20
4.45	21.86	25.59	21.78	25.58	20
4.46667	21.87	25.59	21.79	25.58	19.8
4.48333	21.88	25.59	21.8	25.59	20
4.5	21.89	25.6	21.81	25.6	19.9
4.51667	21.9	25.61	21.81	25.61	20.1
4.53333	21.92	25.63	21.83	25.62	19.9
4.55	21.93	25.64	21.84	25.63	20.1
4.56667	21.93	25.65	21.84	25.63	20
4.58333	21.94	25.66	21.84	25.64	20.1
4.6	21.95	25.67	21.85	25.64	20
4.61667	21.96	25.69	21.86	25.65	20.1
4.63333	21.96	25.7	21.87	25.66	20
4.65	21.97	25.7	21.88	25.67	20
4.66667	21.98	25.72	21.89	25.68	20
4.68333	21.99	25.73	21.9	25.69	20.1
4.7	22	25.75	21.91	25.7	20.1
4.71667	22.01	25.76	21.93	25.71	20
4.73333	22.01	25.78	21.94	25.73	20.1
4.75	22.03	25.79	21.96	25.74	20.1
4.76667	22.04	25.8	21.96	25.75	20
4.78333	22.05	25.8	21.97	25.76	20.1
4.8	22.06	25.82	21.98	25.77	19.9
4.81667	22.07	25.83	21.99	25.78	20
4.83333	22.08	25.84	22	25.79	20.1
4.85	22.09	25.85	22.01	25.79	20
4.86667	22.1	25.87	22.03	25.8	19.9
4.88333	22.11	25.88	22.04	25.82	20
4.9	22.13	25.9	22.04	25.83	20
4.91667	22.15	25.91	22.06	25.84	20
4.93333	22.16	25.93	22.07	25.85	20
4.95	22.18	25.95	22.09	25.87	20.1
4.96667	22.19	25.96	22.1	25.88	20
4.98333	22.21	25.98	22.11	25.89	19.8
5	22.22	25.99	22.13	25.9	20
5.01667	22.23	26	22.14	25.91	19.9
5.03333	22.25	26.01	22.15	25.92	20
5.05	22.27	26.02	22.16	25.93	19.9
5.06667	22.28	26.03	22.16	25.94	19.8
5.08333	22.3	26.04	22.17	25.94	19.9
5.1	22.31	26.06	22.17	25.94	20.1
5.11667	22.32	26.07	22.18	25.95	19.9
5.13333	22.33	26.08	22.19	25.96	19.9
5.15	22.34	26.09	22.2	25.97	20
5.16667	22.36	26.1	22.21	25.98	20
5.18333	22.37	26.11	22.22	25.99	20.1
5.2	22.39	26.12	22.22	26	20
5.21667	22.4	26.13	22.22	26.01	19.9
5.23333	22.4	26.13	22.23	26.01	20.1
5.25	22.41	26.14	22.23	26.02	19.9
5.26667	22.41	26.14	22.24	26.03	20
5.28333	22.42	26.15	22.24	26.04	19.9
5.3	22.43	26.15	22.25	26.04	19.9
5.31667	22.44	26.16	22.25	26.05	20.1
5.33333	22.45	26.16	22.26	26.06	20
5.35	22.46	26.17	22.26	26.07	19.9
5.36667	22.47	26.17	22.27	26.07	19.9
5.38333	22.47	26.18	22.27	26.08	20
5.4	22.48	26.19	22.28	26.09	20
5.41667	22.49	26.19	22.29	26.1	20.1
5.43333	22.5	26.2	22.29	26.11	20
5.45	22.5	26.21	22.3	26.12	20.1
5.46667	22.51	26.21	22.31	26.12	20.2
5.48333	22.52	26.22	22.32	26.13	20
5.5	22.53	26.23	22.33	26.13	20
5.51667	22.53	26.23	22.34	26.14	19.8
5.53333	22.54	26.24	22.34	26.14	19.8
5.55	22.54	26.24	22.35	26.14	20
5.56667	22.55	26.25	22.36	26.15	20.1
5.58333	22.55	26.25	22.37	26.15	19.9
5.6	22.56	26.26	22.38	26.16	19.9
5.61667	22.57	26.26	22.39	26.17	19.9
5.63333	22.57	26.27	22.39	26.17	20.1
5.65	22.58	26.27	22.4	26.18	20
5.66667	22.59	26.28	22.41	26.18	20
5.68333	22.6	26.29	22.42	26.19	20
5.7	22.6	26.29	22.43	26.19	20
5.71667	22.61	26.3	22.44	26.2	20.1
5.73333	22.62	26.3	22.45	26.21	19.9
5.75	22.62	26.32	22.45	26.22	19.9
5.76667	22.63	26.33	22.46	26.23	20.1
5.78333	22.64	26.33	22.47	26.24	20
5.8	22.65	26.34	22.48	26.25	19.9
5.81667	22.66	26.34	22.49	26.26	20.1
5.83333	22.66	26.35	22.5	26.28	19.9
5.85	22.67	26.35	22.51	26.29	19.9
5.86667	22.67	26.36	22.52	26.3	20.1
5.88333	22.68	26.36	22.53	26.31	20
5.9	22.69	26.37	22.54	26.32	19.9
5.91667	22.7	26.38	22.54	26.34	20
5.93333	22.71	26.39	22.55	26.35	20
5.95	22.71	26.39	22.56	26.37	20.1
5.96667	22.72	26.4	22.57	26.38	20.1
5.98333	22.73	26.4	22.58	26.39	20.1
6	22.74	26.41	22.6	26.4	20
6.01667	22.75	26.42	22.61	26.41	20.1
6.03333	22.75	26.43	22.61	26.43	19.9
6.05	22.77	26.44	22.62	26.44	20
6.06667	22.78	26.45	22.63	26.45	20.1
6.08333	22.78	26.46	22.64	26.46	20
6.1	22.79	26.47	22.64	26.46	19.9
6.11667	22.8	26.48	22.65	26.47	20
6.13333	22.8	26.49	22.66	26.48	20
6.15	22.81	26.5	22.67	26.49	20
6.16667	22.82	26.5	22.68	26.5	20
6.18333	22.83	26.51	22.7	26.5	19.9
6.2	22.84	26.52	22.71	26.51	20
6.21667	22.85	26.54	22.72	26.53	20
6.23333	22.86	26.55	22.73	26.54	20
6.25	22.86	26.56	22.74	26.55	19.9
6.26667	22.87	26.57	22.75	26.57	20
6.28333	22.87	26.58	22.76	26.58	20
6.3	22.88	26.59	22.77	26.58	19.9
6.31667	22.88	26.6	22.78	26.59	19.9
6.33333	22.89	26.61	22.79	26.6	20.1
6.35	22.9	26.61	22.79	26.61	20
6.36667	22.9	26.62	22.8	26.62	19.9
6.38333	22.91	26.62	22.81	26.63	20.1
6.4	22.92	26.62	22.82	26.64	20
6.41667	22.93	26.63	22.83	26.64	20
6.43333	22.94	26.64	22.84	26.65	20
6.45	22.95	26.65	22.85	26.67	20
6.46667	22.96	26.66	22.86	26.68	20.1
6.48333	22.97	26.67	22.87	26.69	20
6.5	22.98	26.68	22.87	26.69	19.9
6.51667	22.99	26.69	22.86	26.69	20
6.53333	23	26.7	22.84	26.69	19.9
6.55	23	26.71	22.83	26.68	20.2
6.56667	23.01	26.72	22.81	26.67	20
6.58333	23.02	26.72	22.8	26.66	20.1
6.6	23.03	26.73	22.79	26.66	20.1
6.61667	23.04	26.74	22.79	26.65	19.9
6.63333	23.05	26.75	22.79	26.66	20
6.65	23.06	26.76	22.79	26.67	20
6.66667	23.08	26.77	22.79	26.67	19.9
6.68333	23.09	26.78	22.8	26.68	20.1
6.7	23.1	26.8	22.81	26.69	19.9
6.71667	23.11	26.82	22.82	26.7	20
6.73333	23.12	26.84	22.83	26.71	19.9
6.75	23.14	26.86	22.84	26.72	20
6.76667	23.15	26.87	22.84	26.72	20.1
6.78333	23.16	26.88	22.85	26.73	20.1
6.8	23.17	26.89	22.85	26.74	20
6.81667	23.18	26.9	22.86	26.75	19.9
6.83333	23.19	26.91	22.87	26.76	19.9
6.85	23.2	26.92	22.89	26.77	20.1
6.86667	23.21	26.93	22.92	26.8	19.9
6.88333	23.22	26.94	22.95	26.82	20.1
6.9	23.23	26.95	22.98	26.84	20
6.91667	23.24	26.96	23.02	26.87	20
6.93333	23.25	26.97	23.04	26.89	20
6.95	23.26	26.98	23.06	26.91	20.1
6.96667	23.27	26.99	23.09	26.93	20.1
6.98333	23.28	27	23.11	26.94	20
7	23.29	27	23.13	26.96	20
7.01667	23.3	27.01	23.14	26.97	20.1
7.03333	23.3	27.02	23.15	26.98	19.9
7.05	23.31	27.03	23.16	26.99	20
7.06667	23.31	27.03	23.16	26.99	19.9
7.08333	23.32	27.04	23.17	27	20
7.1	23.32	27.04	23.18	27	20
7.11667	23.32	27.05	23.19	27.01	20
7.13333	23.33	27.06	23.2	27.02	20.1
7.15	23.34	27.06	23.21	27.02	20
7.16667	23.35	27.07	23.21	27.03	20
7.18333	23.36	27.08	23.22	27.04	20.1
7.2	23.36	27.09	23.23	27.04	20
7.21667	23.37	27.1	23.23	27.04	20.1
7.23333	23.39	27.12	23.24	27.05	20
7.25	23.4	27.13	23.24	27.05	20
7.26667	23.4	27.14	23.25	27.06	19.9
7.28333	23.41	27.16	23.26	27.07	19.9
7.3	23.41	27.17	23.27	27.08	19.9
7.31667	23.42	27.18	23.27	27.08	20
7.33333	23.44	27.2	23.27	27.08	19.9
7.35	23.45	27.21	23.27	27.08	19.9
7.36667	23.45	27.22	23.29	27.09	20
7.38333	23.46	27.23	23.29	27.09	20.1
7.4	23.47	27.24	23.31	27.11	20
7.41667	23.48	27.25	23.32	27.12	19.9
7.43333	23.49	27.26	23.33	27.14	20
7.45	23.5	27.27	23.34	27.14	20.1
7.46667	23.51	27.28	23.34	27.15	20
7.48333	23.51	27.29	23.35	27.15	19.9
7.5	23.52	27.3	23.36	27.16	19.9
7.51667	23.52	27.3	23.37	27.17	20
7.53333	23.52	27.3	23.38	27.18	19.9
7.55	23.53	27.3	23.38	27.18	20
7.56667	23.54	27.3	23.39	27.18	20
7.58333	23.54	27.31	23.39	27.19	19.8
7.6	23.54	27.31	23.4	27.19	19.9
7.61667	23.55	27.32	23.4	27.19	20.1
7.63333	23.56	27.32	23.41	27.19	20.1
7.65	23.57	27.33	23.41	27.19	20.1
7.66667	23.58	27.33	23.42	27.2	20
7.68333	23.58	27.33	23.42	27.21	20
7.7	23.59	27.34	23.43	27.22	20.1
7.71667	23.59	27.34	23.43	27.22	20.1
7.73333	23.6	27.35	23.43	27.22	20.1
7.75	23.6	27.36	23.42	27.21	19.9
7.76667	23.61	27.36	23.42	27.21	20.1
7.78333	23.61	27.36	23.42	27.21	20.1
7.8	23.62	27.37	23.42	27.21	20
7.81667	23.63	27.37	23.42	27.2	20
7.83333	23.63	27.38	23.42	27.2	19.9
7.85	23.63	27.38	23.42	27.2	20
7.86667	23.64	27.4	23.42	27.2	19.9
7.88333	23.65	27.4	23.42	27.19	20
7.9	23.66	27.41	23.42	27.2	20.1
7.91667	23.66	27.42	23.43	27.2	20.1
7.93333	23.67	27.42	23.43	27.21	19.9
7.95	23.67	27.42	23.44	27.21	20
7.96667	23.68	27.42	23.44	27.22	19.9
7.98333	23.68	27.43	23.44	27.22	20.1
8	23.69	27.43	23.44	27.22	20
8.01667	23.69	27.44	23.45	27.22	20
8.03333	23.7	27.44	23.45	27.22	19.9
8.05	23.7	27.45	23.45	27.22	19.9
8.06667	23.71	27.45	23.46	27.23	20
8.08333	23.71	27.46	23.47	27.23	20.1
8.1	23.72	27.46	23.48	27.24	20
8.11667	23.73	27.47	23.49	27.24	19.9
8.13333	23.73	27.47	23.5	27.24	20.1
8.15	23.74	27.48	23.51	27.24	19.9
8.16667	23.74	27.48	23.52	27.25	19.9
8.18333	23.75	27.48	23.52	27.25	19.9
8.2	23.76	27.49	23.53	27.26	20
8.21667	23.76	27.49	23.53	27.26	20.1
8.23333	23.77	27.49	23.53	27.26	20
8.25	23.77	27.49	23.54	27.26	20.1
8.26667	23.77	27.49	23.54	27.27	20.1
8.28333	23.77	27.5	23.54	27.27	20.1
8.3	23.78	27.5	23.54	27.28	19.9
8.31667	23.78	27.51	23.54	27.28	19.9
8.33333	23.78	27.52	23.55	27.29	20.1
8.35	23.79	27.52	23.55	27.3	20.1
8.36667	23.8	27.53	23.56	27.3	20.1
8.38333	23.8	27.53	23.56	27.31	20.2
8.4	23.8	27.54	23.56	27.31	20.1
8.41667	23.81	27.55	23.57	27.32	20.1
8.43333	23.82	27.56	23.57	27.33	19.9
8.45	23.82	27.57	23.58	27.34	20
8.46667	23.83	27.58	23.58	27.34	20
8.48333	23.83	27.59	23.59	27.35	20
8.5	23.84	27.6	23.59	27.36	19.9
8.51667	23.85	27.6	23.6	27.37	20.1
8.53333	23.86	27.61	23.6	27.38	20
8.55	23.86	27.62	23.61	27.39	20
8.56667	23.87	27.64	23.62	27.41	20.1
8.58333	23.88	27.64	23.63	27.42	20.1
8.6	23.89	27.65	23.63	27.43	20.1
8.61667	23.9	27.66	23.64	27.44	20
8.63333	23.9	27.66	23.64	27.45	20.2
8.65	23.9	27.67	23.65	27.45	20
8.66667	23.91	27.68	23.65	27.46	20
8.68333	23.92	27.68	23.65	27.46	20.1
8.7	23.93	27.69	23.66	27.47	20
8.71667	23.93	27.7	23.67	27.47	19.9
8.73333	23.94	27.71	23.68	27.48	20.1
8.75	23.95	27.71	23.68	27.49	20.1
8.76667	23.95	27.72	23.68	27.5	19.9
8.78333	23.95	27.72	23.69	27.51	20.1
8.8	23.96	27.73	23.69	27.51	20
8.81667	23.97	27.73	23.7	27.52	19.9
8.83333	23.98	27.74	23.7	27.52	19.9
8.85	23.99	27.75	23.71	27.53	19.9
8.86667	23.99	27.75	23.72	27.53	20
8.88333	23.99	27.76	23.72	27.54	20
8.9	24	27.77	23.73	27.54	19.9
8.91667	24	27.77	23.74	27.55	19.9
8.93333	24	27.78	23.74	27.55	20
8.95	24.01	27.8	23.74	27.55	20.1
8.96667	24.02	27.8	23.74	27.55	20
8.98333	24.03	27.81	23.75	27.55	20.1
9	24.04	27.82	23.75	27.56	20
9.01667	24.04	27.83	23.76	27.57	20
9.03333	24.05	27.84	23.77	27.58	20.1
9.05	24.06	27.85	23.78	27.59	19.9
9.06667	24.07	27.85	23.78	27.6	20.1
9.08333	24.08	27.86	23.79	27.6	19.8
9.1	24.08	27.86	23.79	27.61	20.1
9.11667	24.09	27.87	23.8	27.61	19.9
9.13333	24.1	27.87	23.81	27.62	20.1
9.15	24.1	27.88	23.81	27.63	20.1
9.16667	24.11	27.89	23.82	27.63	20
9.18333	24.11	27.89	23.82	27.64	20
9.2	24.12	27.9	23.83	27.64	19.9
9.21667	24.13	27.91	23.83	27.65	19.9
9.23333	24.14	27.91	23.84	27.66	19.9
9.25	24.14	27.91	23.84	27.66	20.1
9.26667	24.15	27.92	23.84	27.66	20
9.28333	24.16	27.93	23.85	27.67	20
9.3	24.17	27.94	23.86	27.68	19.9
9.31667	24.18	27.94	23.87	27.69	19.9
9.33333	24.18	27.95	23.88	27.7	20.1
9.35	24.19	27.95	23.89	27.72	20
9.36667	24.2	27.96	23.89	27.73	19.9
9.38333	24.2	27.96	23.9	27.74	19.9
9.4	24.2	27.97	23.91	27.74	19.9
9.41667	24.2	27.98	23.91	27.75	20
9.43333	24.21	27.99	23.92	27.76	20
9.45	24.22	28	23.93	27.77	20.1
9.46667	24.23	28	23.93	27.78	20
9.48333	24.23	28.01	23.94	27.78	20
9.5	24.24	28.02	23.94	27.79	19.9
9.51667	24.24	28.03	23.95	27.8	20.1
9.53333	24.25	28.03	23.95	27.81	20
9.55	24.25	28.04	23.95	27.82	20
9.56667	24.26	28.04	23.96	27.82	19.9
9.58333	24.26	28.04	23.96	27.82	19.9
9.6	24.26	28.04	23.97	27.83	20.1
9.61667	24.27	28.05	23.98	27.84	19.9
9.63333	24.27	28.05	23.99	27.84	20.1
9.65	24.28	28.05	23.99	27.84	20.1
9.66667	24.28	28.06	24	27.85	20
9.68333	24.29	28.06	24	27.85	20
9.7	24.3	28.07	24.01	27.85	20.1
9.71667	24.3	28.08	24.01	27.85	20.1
9.73333	24.31	28.09	24.02	27.86	19.9
9.75	24.31	28.09	24.02	27.86	20
9.76667	24.32	28.1	24.03	27.86	19.8
9.78333	24.33	28.1	24.03	27.86	20
9.8	24.33	28.1	24.04	27.86	19.9
9.81667	24.34	28.11	24.04	27.87	20.1
9.83333	24.34	28.11	24.05	27.87	20
9.85	24.35	28.12	24.05	27.88	20.1
9.86667	24.35	28.12	24.05	27.88	20
9.88333	24.36	28.13	24.06	27.89	19.9
9.9	24.37	28.14	24.06	27.89	20.2
9.91667	24.38	28.16	24.07	27.9	20.2
9.93333	24.4	28.17	24.07	27.91	19.9
9.95	24.4	28.19	24.08	27.91	19.9
9.96667	24.4	28.19	24.08	27.92	20
9.98333	24.41	28.2	24.08	27.92	20.1
10	24.42	28.2	24.09	27.93	19.9
10.0167	24.43	28.21	24.09	27.93	20
10.0333	24.43	28.21	24.1	27.94	20
10.05	24.43	28.22	24.1	27.95	20
10.0667	24.44	28.22	24.11	27.95	20
10.0833	24.44	28.22	24.11	27.95	19.9
10.1	24.45	28.23	24.12	27.96	20
10.1167	24.45	28.24	24.12	27.97	20.1
10.1333	24.45	28.24	24.13	27.98	20.1
10.15	24.46	28.25	24.13	27.99	20
10.1667	24.46	28.25	24.13	28	20
10.1833	24.47	28.26	24.14	28.01	20
10.2	24.47	28.26	24.14	28.01	20
10.2167	24.48	28.27	24.15	28.02	20.1
10.2333	24.48	28.27	24.16	28.02	20
10.25	24.48	28.27	24.17	28.03	19.9
10.2667	24.48	28.27	24.18	28.04	20.1
10.2833	24.48	28.27	24.19	28.04	20
10.3	24.48	28.27	24.2	28.05	20
10.3167	24.49	28.28	24.2	28.05	20.1
10.3333	24.49	28.28	24.2	28.06	19.9
10.35	24.49	28.29	24.21	28.06	19.9
10.3667	24.5	28.29	24.21	28.07	20.1
10.3833	24.5	28.3	24.21	28.07	19.9
10.4	24.51	28.3	24.22	28.07	19.9
10.4167	24.51	28.31	24.22	28.08	19.9
10.4333	24.52	28.32	24.23	28.09	20.2
10.45	24.52	28.32	24.23	28.09	20.1
10.4667	24.53	28.33	24.24	28.09	20
10.4833	24.54	28.33	24.24	28.1	20.1
10.5	24.54	28.34	24.24	28.1	20
10.5167	24.55	28.34	24.25	28.11	20
10.5333	24.55	28.35	24.25	28.11	20
10.55	24.56	28.35	24.25	28.12	20
10.5667	24.56	28.36	24.25	28.12	19.9
10.5833	24.57	28.36	24.25	28.13	20
10.6	24.58	28.37	24.26	28.13	20
10.6167	24.58	28.38	24.26	28.13	20
10.6333	24.59	28.38	24.26	28.13	20.1
10.65	24.6	28.39	24.26	28.14	20
10.6667	24.6	28.39	24.27	28.14	20
10.6833	24.6	28.4	24.28	28.15	20
10.7	24.61	28.4	24.29	28.16	20
10.7167	24.62	28.4	24.3	28.17	19.9
10.7333	24.63	28.41	24.3	28.18	19.9
10.75	24.64	28.41	24.31	28.18	20
10.7667	24.64	28.42	24.31	28.19	19.9
10.7833	24.64	28.42	24.32	28.19	20.1
10.8	24.64	28.43	24.32	28.2	20.1
10.8167	24.65	28.43	24.32	28.21	19.9
10.8333	24.65	28.44	24.33	28.21	20.1
10.85	24.66	28.44	24.33	28.21	19.9
10.8667	24.66	28.45	24.34	28.21	20.1
10.8833	24.67	28.45	24.34	28.22	20.1
10.9	24.67	28.46	24.34	28.22	19.9
10.9167	24.68	28.46	24.35	28.23	20
10.9333	24.69	28.47	24.35	28.23	20
10.95	24.69	28.47	24.35	28.24	19.9
10.9667	24.69	28.47	24.36	28.25	20
10.9833	24.69	28.48	24.37	28.25	20.1
11	24.69	28.48	24.38	28.26	19.9
11.0167	24.69	28.48	24.38	28.26	20.1
11.0333	24.7	28.49	24.39	28.27	20
11.05	24.7	28.49	24.39	28.27	20.1
11.0667	24.7	28.5	24.4	28.28	19.9
11.0833	24.7	28.5	24.4	28.28	20
11.1	24.69	28.49	24.41	28.27	20.1
11.1167	24.69	28.49	24.41	28.27	20
11.1333	24.7	28.49	24.42	28.27	19.8
11.15	24.7	28.49	24.42	28.27	20.1
11.1667	24.71	28.49	24.43	28.27	20.1
11.1833	24.71	28.49	24.43	28.28	20.1
11.2	24.72	28.49	24.43	28.28	20
11.2167	24.72	28.49	24.43	28.28	20.1
11.2333	24.73	28.49	24.43	28.27	20
11.25	24.74	28.49	24.43	28.27	20.1
11.2667	24.74	28.49	24.43	28.27	19.9
11.2833	24.74	28.49	24.44	28.26	20
11.3	24.75	28.49	24.44	28.26	19.9
11.3167	24.75	28.49	24.44	28.25	20
11.3333	24.76	28.5	24.43	28.25	20
11.35	24.77	28.5	24.43	28.25	19.9
11.3667	24.77	28.5	24.43	28.25	20.2
11.3833	24.78	28.5	24.43	28.24	20
11.4	24.79	28.5	24.42	28.24	19.9
11.4167	24.79	28.5	24.42	28.23	20
11.4333	24.8	28.5	24.42	28.23	20
11.45	24.8	28.51	24.42	28.24	19.9
11.4667	24.81	28.51	24.42	28.24	19.9
11.4833	24.81	28.52	24.42	28.24	20
11.5	24.82	28.53	24.42	28.24	20
11.5167	24.81	28.54	24.42	28.24	20
11.5333	24.81	28.55	24.43	28.24	20
11.55	24.81	28.56	24.43	28.24	20.1
11.5667	24.82	28.57	24.44	28.24	20.1
11.5833	24.82	28.58	24.44	28.25	19.9
11.6	24.82	28.59	24.44	28.26	19.9
11.6167	24.82	28.6	24.44	28.26	20
11.6333	24.83	28.61	24.44	28.26	20
11.65	24.83	28.62	24.44	28.26	20
11.6667	24.84	28.63	24.44	28.27	19.9
11.6833	24.84	28.64	24.45	28.27	20.1
11.7	24.85	28.65	24.45	28.28	20
11.7167	24.86	28.66	24.45	28.28	20.1
11.7333	24.86	28.67	24.46	28.29	19.9
11.75	24.86	28.68	24.47	28.3	20
11.7667	24.87	28.69	24.48	28.3	20.1
11.7833	24.87	28.7	24.48	28.31	19.9
11.8	24.88	28.71	24.48	28.31	19.9
11.8167	24.88	28.71	24.48	28.32	20.1
11.8333	24.89	28.72	24.49	28.33	20
11.85	24.9	28.72	24.49	28.33	19.9
11.8667	24.9	28.73	24.49	28.34	20.1
11.8833	24.91	28.73	24.5	28.34	19.9
11.9	24.92	28.74	24.5	28.35	20
11.9167	24.92	28.74	24.51	28.36	20
11.9333	24.93	28.75	24.51	28.36	20.1
11.95	24.94	28.76	24.52	28.37	19.9
11.9667	24.95	28.77	24.52	28.37	19.9
11.9833	24.95	28.77	24.53	28.38	19.9
12	24.96	28.78	24.53	28.39	20.1
12.0167	24.96	28.79	24.54	28.4	20
12.0333	24.97	28.8	24.54	28.4	19.9
12.05	24.98	28.8	24.54	28.4	20.1
12.0667	24.98	28.81	24.54	28.4	20.1
12.0833	24.99	28.82	24.54	28.4	20.1
12.1	25	28.83	24.54	28.4	20.1
12.1167	25.01	28.83	24.54	28.4	20
12.1333	25.02	28.84	24.54	28.4	20.1
12.15	25.02	28.85	24.54	28.4	20.1
12.1667	25.03	28.86	24.54	28.4	20
12.1833	25.04	28.86	24.54	28.4	19.9
12.2	25.05	28.87	24.54	28.4	20.1
12.2167	25.05	28.87	24.54	28.4	20
12.2333	25.06	28.88	24.54	28.4	19.9
12.25	25.07	28.88	24.54	28.4	20
12.2667	25.08	28.89	24.54	28.39	19.9
12.2833	25.09	28.9	24.54	28.39	19.9
12.3	25.09	28.9	24.54	28.39	20.1
12.3167	25.09	28.9	24.54	28.39	20.1
12.3333	25.1	28.9	24.54	28.39	20.1
12.35	25.1	28.9	24.54	28.38	19.9
12.3667	25.1	28.9	24.54	28.38	19.9
12.3833	25.1	28.9	24.55	28.38	19.9
12.4	25.11	28.9	24.55	28.38	20
12.4167	25.11	28.91	24.55	28.38	19.9
12.4333	25.11	28.91	24.55	28.39	20
12.45	25.11	28.92	24.55	28.39	20.1
12.4667	25.11	28.92	24.55	28.4	20
12.4833	25.11	28.93	24.55	28.4	20.1
12.5	25.12	28.93	24.55	28.41	20.1
12.5167	25.12	28.94	24.55	28.41	19.9
12.5333	25.12	28.95	24.55	28.41	20
12.55	25.12	28.95	24.56	28.41	19.9
12.5667	25.12	28.96	24.57	28.41	20
12.5833	25.13	28.96	24.57	28.42	19.9
12.6	25.13	28.97	24.58	28.42	20
12.6167	25.13	28.97	24.58	28.43	20.1
12.6333	25.13	28.97	24.59	28.43	20
12.65	25.14	28.97	24.59	28.43	20
12.6667	25.15	28.98	24.59	28.43	20.1
12.6833	25.15	28.98	24.59	28.44	20
12.7	25.16	28.99	24.59	28.44	20
12.7167	25.16	28.99	24.6	28.44	20
12.7333	25.17	29	24.6	28.44	20
12.75	25.17	29	24.6	28.44	20
12.7667	25.18	29	24.61	28.44	20.1
12.7833	25.18	29	24.61	28.44	19.9
12.8	25.19	29	24.62	28.44	20
12.8167	25.19	29	24.62	28.44	19.9
12.8333	25.19	29	24.63	28.44	20
12.85	25.19	29	24.64	28.44	20
12.8667	25.2	29	24.64	28.44	20
12.8833	25.2	29	24.65	28.45	20.1
12.9	25.2	29.01	24.65	28.45	20
12.9167	25.21	29.01	24.65	28.46	19.9
12.9333	25.21	29.01	24.65	28.47	20
12.95	25.22	29.01	24.66	28.47	20
12.9667	25.22	29.02	24.67	28.48	20
12.9833	25.23	29.02	24.67	28.49	20
13	25.23	29.02	24.68	28.5	20
13.0167	25.23	29.02	24.69	28.51	20.1
13.0333	25.23	29.02	24.7	28.52	20.1
13.05	25.23	29.02	24.71	28.53	20
13.0667	25.24	29.03	24.72	28.54	20
13.0833	25.24	29.03	24.72	28.54	20
13.1	25.24	29.04	24.73	28.55	19.9
13.1167	25.25	29.05	24.74	28.56	20
13.1333	25.26	29.06	24.74	28.56	19.9
13.15	25.27	29.06	24.75	28.57	19.9
13.1667	25.27	29.07	24.75	28.57	19.9
13.1833	25.28	29.07	24.76	28.58	20
13.2	25.28	29.08	24.76	28.58	20.1
13.2167	25.29	29.08	24.77	28.59	20
13.2333	25.29	29.08	24.77	28.59	20
13.25	25.3	29.08	24.77	28.6	19.9
13.2667	25.3	29.09	24.78	28.61	20
13.2833	25.3	29.09	24.78	28.6	20.1
13.3	25.3	29.09	24.78	28.6	20
13.3167	25.3	29.09	24.78	28.6	20
13.3333	25.3	29.1	24.78	28.6	20
13.35	25.31	29.1	24.78	28.59	20
13.3667	25.31	29.1	24.78	28.58	20
13.3833	25.32	29.11	24.77	28.58	20.1
13.4	25.32	29.11	24.77	28.58	20
13.4167	25.32	29.11	24.77	28.57	20
13.4333	25.33	29.11	24.77	28.58	20
13.45	25.33	29.11	24.77	28.58	19.9
13.4667	25.33	29.1	24.77	28.58	20
13.4833	25.33	29.1	24.77	28.58	20.1
13.5	25.33	29.1	24.76	28.59	20.1
13.5167	25.33	29.1	24.76	28.59	20
13.5333	25.33	29.1	24.76	28.6	20
13.55	25.34	29.11	24.77	28.6	19.9
13.5667	25.34	29.11	24.77	28.61	19.9
13.5833	25.35	29.12	24.78	28.61	20.1
13.6	25.35	29.12	24.79	28.62	19.9
13.6167	25.35	29.13	24.79	28.62	20.1
13.6333	25.35	29.13	24.79	28.62	20
13.65	25.35	29.13	24.8	28.63	20
13.6667	25.35	29.13	24.8	28.63	20.1
13.6833	25.35	29.14	24.8	28.64	20.1
13.7	25.35	29.14	24.81	28.64	20
13.7167	25.35	29.14	24.81	28.65	20.1
13.7333	25.36	29.14	24.82	28.66	20
13.75	25.35	29.14	24.83	28.66	20.1
13.7667	25.36	29.14	24.83	28.67	20.1
13.7833	25.36	29.14	24.84	28.67	20.1
13.8	25.36	29.14	24.84	28.67	20
13.8167	25.36	29.15	24.84	28.67	20
13.8333	25.36	29.15	24.84	28.67	20
13.85	25.36	29.15	24.84	28.67	20.2
13.8667	25.37	29.15	24.84	28.67	20
13.8833	25.37	29.15	24.85	28.68	20
13.9	25.37	29.15	24.85	28.68	20.1
13.9167	25.37	29.15	24.84	28.69	20
13.9333	25.37	29.15	24.84	28.69	20
13.95	25.38	29.15	24.84	28.69	20
13.9667	25.39	29.15	24.84	28.69	19.9
13.9833	25.4	29.15	24.85	28.7	19.9
14	25.4	29.16	24.85	28.7	19.9
14.0167	25.4	29.17	24.85	28.71	20.1
14.0333	25.4	29.17	24.86	28.72	19.9
14.05	25.41	29.18	24.86	28.73	19.9
14.0667	25.42	29.18	24.86	28.73	19.9
14.0833	25.42	29.19	24.86	28.73	20
14.1	25.43	29.19	24.87	28.74	19.9
14.1167	25.44	29.2	24.87	28.74	20
14.1333	25.44	29.21	24.88	28.74	20
14.15	25.45	29.22	24.88	28.75	20
14.1667	25.46	29.23	24.89	28.76	19.9
14.1833	25.47	29.24	24.89	28.76	20
14.2	25.47	29.25	24.9	28.77	20.1
14.2167	25.48	29.25	24.91	28.77	20
14.2333	25.48	29.25	24.91	28.77	20
14.25	25.49	29.26	24.91	28.77	20
14.2667	25.49	29.26	24.92	28.77	20
14.2833	25.49	29.26	24.92	28.77	20
14.3	25.49	29.26	24.93	28.77	19.9
14.3167	25.49	29.26	24.93	28.78	19.9
14.3333	25.49	29.26	24.93	28.78	20.1
14.35	25.49	29.26	24.93	28.78	19.9
14.3667	25.5	29.26	24.94	28.77	20
14.3833	25.5	29.27	24.93	28.77	20
14.4	25.5	29.27	24.94	28.77	20.1
14.4167	25.5	29.27	24.94	28.77	20.1
14.4333	25.5	29.27	24.94	28.77	20.1
14.45	25.51	29.28	24.94	28.78	20
14.4667	25.51	29.28	24.94	28.78	20.1
14.4833	25.52	29.27	24.94	28.78	19.9
14.5	25.52	29.27	24.94	28.79	20
14.5167	25.52	29.27	24.94	28.79	20
14.5333	25.52	29.28	24.95	28.8	20.1
14.55	25.52	29.28	24.95	28.81	20
14.5667	25.52	29.28	24.95	28.81	20.1
14.5833	25.53	29.28	24.95	28.82	20.1
14.6	25.53	29.29	24.96	28.82	20
14.6167	25.54	29.3	24.96	28.83	19.9
14.6333	25.55	29.3	24.97	28.83	19.9
14.65	25.56	29.31	24.98	28.83	20.1
14.6667	25.56	29.32	24.98	28.83	19.9
14.6833	25.57	29.33	24.99	28.83	19.9
14.7	25.58	29.34	24.99	28.84	20
14.7167	25.58	29.34	25	28.84	20
14.7333	25.59	29.35	25.01	28.84	20
14.75	25.59	29.35	25.01	28.84	20.1
14.7667	25.59	29.35	25.02	28.85	20
14.7833	25.59	29.35	25.02	28.86	20.1
14.8	25.59	29.36	25.03	28.85	20
14.8167	25.59	29.36	25.03	28.86	20
14.8333	25.59	29.36	25.03	28.86	20
14.85	25.59	29.36	25.04	28.86	19.8
14.8667	25.59	29.36	25.04	28.86	19.9
14.8833	25.59	29.35	25.04	28.85	20
14.9	25.59	29.35	25.04	28.85	19.9
14.9167	25.59	29.36	25.04	28.85	19.9
14.9333	25.6	29.36	25.04	28.85	20.1
14.95	25.6	29.36	25.04	28.86	20
14.9667	25.6	29.36	25.04	28.86	20
14.9833	25.6	29.36	25.04	28.86	20
15	25.6	29.36	25.04	28.87	20
15.0167	25.6	29.36	25.04	28.87	19.9
15.0333	25.6	29.36	25.05	28.88	20
15.05	25.6	29.37	25.05	28.89	19.9
15.0667	25.6	29.37	25.05	28.9	19.9
15.0833	25.6	29.37	25.06	28.91	20
15.1	25.61	29.37	25.06	28.92	19.9
15.1167	25.61	29.38	25.07	28.92	19.9
15.1333	25.61	29.39	25.07	28.92	20
15.15	25.62	29.39	25.08	28.93	20
15.1667	25.63	29.39	25.08	28.94	19.9
15.1833	25.63	29.4	25.09	28.94	20.1
15.2	25.64	29.41	25.1	28.94	19.9
15.2167	25.65	29.42	25.11	28.95	19.9
15.2333	25.65	29.43	25.12	28.96	20.2
15.25	25.66	29.44	25.12	28.97	20
15.2667	25.67	29.44	25.13	28.97	20
15.2833	25.67	29.45	25.14	28.98	20.1
15.3	25.67	29.45	25.14	28.98	20.1
15.3167	25.68	29.46	25.14	28.99	20
15.3333	25.69	29.46	25.14	28.99	20
15.35	25.69	29.46	25.14	29	19.9
15.3667	25.69	29.47	25.14	29	20
15.3833	25.69	29.47	25.15	29	20
15.4	25.69	29.47	25.15	29	20.2
15.4167	25.7	29.48	25.14	28.99	20.1
15.4333	25.7	29.48	25.14	28.99	20
15.45	25.71	29.49	25.14	28.98	20
15.4667	25.72	29.49	25.13	28.98	20.1
15.4833	25.72	29.49	25.13	28.98	20
15.5	25.72	29.5	25.13	28.98	19.9
15.5167	25.73	29.5	25.12	28.98	20
15.5333	25.73	29.5	25.12	28.97	19.9
15.55	25.73	29.51	25.12	28.97	19.9
15.5667	25.74	29.51	25.12	28.97	19.9
15.5833	25.74	29.51	25.11	28.96	20
15.6	25.74	29.51	25.11	28.96	20
15.6167	25.74	29.51	25.11	28.96	20
15.6333	25.74	29.51	25.11	28.96	19.9
15.65	25.74	29.51	25.11	28.96	20
15.6667	25.73	29.51	25.11	28.96	20.1
15.6833	25.73	29.5	25.12	28.97	19.9
15.7	25.74	29.51	25.13	28.97	19.9
15.7167	25.75	29.52	25.13	28.97	19.8
15.7333	25.75	29.53	25.13	28.97	20.1
15.75	25.75	29.53	25.13	28.98	20.1
15.7667	25.75	29.53	25.14	28.98	20
15.7833	25.75	29.53	25.14	28.98	20.2
15.8	25.75	29.53	25.14	28.99	19.9
15.8167	25.75	29.53	25.14	28.99	19.9
15.8333	25.75	29.54	25.14	28.99	19.9
15.85	25.75	29.54	25.14	28.99	19.9
15.8667	25.76	29.54	25.15	28.99	20
15.8833	25.77	29.55	25.15	29	20.1
15.9	25.77	29.56	25.15	29	19.9
15.9167	25.77	29.56	25.15	29	19.9
15.9333	25.78	29.57	25.16	29	20.1
15.95	25.78	29.57	25.16	29.01	20.1
15.9667	25.78	29.57	25.17	29.01	20
15.9833	25.79	29.58	25.18	29.02	20
16	25.8	29.59	25.18	29.02	20
16.0167	25.81	29.6	25.18	29.02	20
16.0333	25.82	29.61	25.17	29.02	19.9
16.05	25.82	29.61	25.18	29.02	20
16.0667	25.83	29.62	25.18	29.02	19.9
16.0833	25.84	29.62	25.18	29.03	19.9
16.1	25.84	29.63	25.18	29.03	19.9
16.1167	25.85	29.63	25.19	29.04	20.1
16.1333	25.85	29.64	25.19	29.04	20
16.15	25.85	29.64	25.19	29.04	20.1
16.1667	25.86	29.65	25.2	29.04	20
16.1833	25.87	29.65	25.21	29.04	20
16.2	25.87	29.66	25.22	29.05	20
16.2167	25.87	29.66	25.22	29.05	20
16.2333	25.88	29.66	25.23	29.06	20
16.25	25.88	29.66	25.23	29.06	19.9
16.2667	25.88	29.67	25.24	29.07	20
16.2833	25.89	29.67	25.24	29.07	20
16.3	25.9	29.68	25.24	29.07	20
16.3167	25.9	29.69	25.24	29.07	20.1
16.3333	25.9	29.69	25.24	29.07	19.9
16.35	25.9	29.69	25.24	29.07	20
16.3667	25.9	29.69	25.24	29.07	20.1
16.3833	25.9	29.68	25.24	29.07	20
16.4	25.9	29.68	25.24	29.07	20
16.4167	25.9	29.68	25.25	29.07	20
16.4333	25.9	29.68	25.25	29.07	20.1
16.45	25.9	29.68	25.25	29.07	19.9
16.4667	25.9	29.68	25.25	29.07	20
16.4833	25.9	29.68	25.26	29.07	20
16.5	25.91	29.69	25.26	29.08	20
16.5167	25.9	29.7	25.26	29.08	20
16.5333	25.9	29.7	25.26	29.08	20
16.55	25.91	29.7	25.26	29.08	20
16.5667	25.91	29.7	25.26	29.08	20
16.5833	25.91	29.71	25.26	29.08	20.1
16.6	25.92	29.71	25.26	29.09	20
16.6167	25.92	29.72	25.26	29.09	20
16.6333	25.93	29.72	25.27	29.1	19.9
16.65	25.93	29.72	25.27	29.11	19.9
16.6667	25.93	29.73	25.27	29.11	20
16.6833	25.93	29.73	25.28	29.11	20
16.7	25.93	29.73	25.28	29.12	19.8
16.7167	25.93	29.74	25.29	29.12	20
16.7333	25.94	29.75	25.3	29.13	20.1
16.75	25.94	29.75	25.3	29.13	20
16.7667	25.95	29.76	25.3	29.13	20
16.7833	25.95	29.76	25.3	29.13	20.1
16.8	25.96	29.77	25.3	29.13	20
16.8167	25.96	29.77	25.3	29.13	20
16.8333	25.96	29.77	25.31	29.13	20
16.85	25.96	29.77	25.31	29.13	19.9
16.8667	25.97	29.77	25.32	29.13	20.1
16.8833	25.97	29.78	25.32	29.13	20.1
16.9	25.97	29.78	25.33	29.14	20.1
16.9167	25.97	29.78	25.32	29.14	20
16.9333	25.97	29.78	25.32	29.13	20.1
16.95	25.97	29.78	25.32	29.13	19.9
16.9667	25.97	29.78	25.33	29.13	20
16.9833	25.98	29.78	25.33	29.13	20
17	25.98	29.78	25.33	29.13	19.9
17.0167	25.99	29.78	25.33	29.13	20.1
17.0333	26	29.79	25.33	29.13	20
17.05	26	29.79	25.33	29.13	20.1
17.0667	26	29.79	25.33	29.12	20
17.0833	26	29.79	25.33	29.12	20
17.1	26	29.79	25.34	29.11	20.1
17.1167	26	29.79	25.34	29.12	20
17.1333	26.01	29.79	25.34	29.12	20.1
17.15	26.01	29.79	25.34	29.12	20.1
17.1667	26.01	29.79	25.35	29.13	20.1
17.1833	26.01	29.79	25.35	29.12	20
17.2	26.01	29.78	25.35	29.12	20
17.2167	26.01	29.78	25.35	29.12	20
17.2333	26.01	29.77	25.35	29.13	19.9
17.25	26	29.77	25.35	29.13	20
17.2667	26	29.76	25.35	29.13	19.9
17.2833	26	29.76	25.35	29.14	20
17.3	26	29.75	25.36	29.14	20
17.3167	26	29.75	25.36	29.14	19.9
17.3333	25.99	29.74	25.36	29.14	20.1
17.35	25.98	29.74	25.36	29.14	20.1
17.3667	25.97	29.73	25.37	29.14	20
17.3833	25.97	29.73	25.36	29.14	19.8
17.4	25.96	29.72	25.36	29.14	20
17.4167	25.97	29.72	25.36	29.15	19.9
17.4333	25.97	29.72	25.35	29.15	19.9
17.45	25.97	29.72	25.35	29.16	20
17.4667	25.97	29.72	25.35	29.16	20.1
17.4833	25.96	29.72	25.35	29.16	20
17.5	25.96	29.72	25.35	29.16	20.1
17.5167	25.97	29.72	25.35	29.16	20
17.5333	25.97	29.73	25.35	29.17	20.1
17.55	25.97	29.73	25.35	29.17	20
17.5667	25.97	29.74	25.35	29.17	20
17.5833	25.97	29.74	25.35	29.16	20.1
17.6	25.98	29.75	25.35	29.16	19.9
17.6167	25.98	29.75	25.35	29.16	19.9
17.6333	25.98	29.76	25.36	29.16	20
17.65	25.99	29.77	25.35	29.16	20
17.6667	26	29.78	25.35	29.16	19.9
17.6833	26	29.79	25.34	29.16	20.1
17.7	26.01	29.79	25.34	29.16	20
17.7167	26.02	29.8	25.35	29.16	20.2
17.7333	26.03	29.8	25.35	29.17	20
17.75	26.03	29.8	25.36	29.17	20.1
17.7667	26.03	29.81	25.37	29.18	20.1
17.7833	26.04	29.81	25.38	29.18	20
17.8	26.05	29.82	25.38	29.19	19.9
17.8167	26.05	29.83	25.38	29.19	20
17.8333	26.05	29.83	25.39	29.19	19.9
17.85	26.06	29.84	25.39	29.19	19.9
17.8667	26.06	29.84	25.39	29.19	20.1
17.8833	26.07	29.85	25.4	29.2	20.1
17.9	26.07	29.86	25.4	29.2	20
17.9167	26.09	29.87	25.41	29.21	19.9
17.9333	26.1	29.88	25.41	29.22	20
17.95	26.1	29.88	25.42	29.23	20
17.9667	26.1	29.89	25.42	29.23	20
17.9833	26.11	29.89	25.43	29.23	20.1
18	26.12	29.89	25.44	29.23	20
18.0167	26.12	29.89	25.44	29.23	20
18.0333	26.12	29.89	25.44	29.24	20.2
18.05	26.13	29.9	25.45	29.24	19.9
18.0667	26.13	29.9	25.45	29.24	19.9
18.0833	26.13	29.9	25.45	29.24	20
18.1	26.13	29.91	25.45	29.24	20
18.1167	26.13	29.92	25.45	29.24	20
18.1333	26.13	29.92	25.45	29.23	20.1
18.15	26.13	29.92	25.44	29.23	20
18.1667	26.13	29.92	25.45	29.23	20.1
18.1833	26.14	29.92	25.45	29.23	20.1
18.2	26.14	29.92	25.45	29.24	20
18.2167	26.14	29.92	25.45	29.24	19.9
18.2333	26.14	29.91	25.45	29.24	19.9
18.25	26.14	29.91	25.45	29.24	20
18.2667	26.13	29.91	25.45	29.24	20.1
18.2833	26.13	29.9	25.45	29.24	20
18.3	26.13	29.91	25.45	29.24	20.1
18.3167	26.13	29.9	25.45	29.24	20.1
18.3333	26.12	29.9	25.45	29.24	20.1
18.35	26.12	29.91	25.45	29.25	20
18.3667	26.12	29.91	25.45	29.25	20
18.3833	26.12	29.91	25.45	29.25	19.9
18.4	26.11	29.91	25.45	29.25	20
18.4167	26.12	29.91	25.45	29.25	20
18.4333	26.12	29.91	25.46	29.26	20
18.45	26.12	29.91	25.46	29.26	20
18.4667	26.12	29.91	25.46	29.26	20
18.4833	26.12	29.91	25.45	29.26	20.1
18.5	26.13	29.91	25.45	29.27	20.2
18.5167	26.13	29.9	25.45	29.27	19.9
18.5333	26.13	29.9	25.45	29.27	20.1
18.55	26.12	29.9	25.45	29.27	20
18.5667	26.12	29.9	25.46	29.27	19.9
18.5833	26.12	29.9	25.46	29.27	20
18.6	26.13	29.91	25.46	29.27	20
18.6167	26.13	29.91	25.46	29.27	19.9
18.6333	26.13	29.91	25.46	29.27	20
18.65	26.13	29.91	25.46	29.27	20.1
18.6667	26.14	29.92	25.46	29.27	20
18.6833	26.14	29.92	25.46	29.27	19.9
18.7	26.13	29.92	25.47	29.27	19.9
18.7167	26.14	29.92	25.47	29.27	20
18.7333	26.14	29.93	25.48	29.28	20
18.75	26.14	29.93	25.48	29.28	19.9
18.7667	26.14	29.93	25.48	29.29	20
18.7833	26.14	29.93	25.49	29.29	20.1
18.8	26.15	29.94	25.49	29.3	20
18.8167	26.15	29.94	25.5	29.3	20.1
18.8333	26.15	29.94	25.51	29.31	20
18.85	26.15	29.94	25.52	29.31	20.1
18.8667	26.16	29.95	25.52	29.32	20.1
18.8833	26.16	29.95	25.53	29.32	19.9
18.9	26.16	29.96	25.54	29.33	19.9
18.9167	26.17	29.96	25.54	29.33	19.9
18.9333	26.17	29.96	25.54	29.34	20
18.95	26.17	29.96	25.54	29.34	20
18.9667	26.17	29.96	25.54	29.34	20
18.9833	26.18	29.96	25.54	29.34	19.9
19	26.18	29.96	25.55	29.34	20
19.0167	26.18	29.96	25.55	29.35	20
19.0333	26.18	29.96	25.55	29.35	20.1
19.05	26.19	29.97	25.55	29.35	20
19.0667	26.19	29.97	25.54	29.35	20
19.0833	26.19	29.97	25.54	29.34	20
19.1	26.2	29.97	25.54	29.34	20
19.1167	26.2	29.97	25.54	29.34	20
19.1333	26.2	29.98	25.54	29.33	20.1
19.15	26.21	29.98	25.54	29.33	19.9
19.1667	26.22	29.99	25.53	29.32	20
19.1833	26.22	29.99	25.53	29.32	20
19.2	26.22	30	25.52	29.31	19.9
19.2167	26.23	30	25.52	29.31	20
19.2333	26.23	30	25.52	29.3	20.1
19.25	26.23	30.01	25.51	29.3	20.1
19.2667	26.24	30.01	25.51	29.3	20.1
19.2833	26.24	30.02	25.51	29.29	19.8
19.3	26.25	30.02	25.52	29.3	20
19.3167	26.25	30.03	25.52	29.3	20
19.3333	26.25	30.03	25.52	29.29	19.9
19.35	26.26	30.04	25.52	29.29	20.1
19.3667	26.26	30.04	25.52	29.28	20.1
19.3833	26.27	30.05	25.52	29.28	20
19.4	26.27	30.05	25.51	29.28	19.9
19.4167	26.27	30.06	25.51	29.27	19.9
19.4333	26.28	30.06	25.52	29.27	20.1
19.45	26.28	30.07	25.52	29.27	20
19.4667	26.28	30.07	25.51	29.27	19.9
19.4833	26.28	30.07	25.51	29.27	20.1
19.5	26.28	30.07	25.51	29.27	19.9
19.5167	26.29	30.07	25.51	29.27	19.9
19.5333	26.29	30.08	25.51	29.27	20.1
19.55	26.29	30.09	25.51	29.27	20.1
19.5667	26.29	30.09	25.51	29.26	20.1
19.5833	26.3	30.09	25.51	29.26	20
19.6	26.3	30.09	25.5	29.26	19.9
19.6167	26.3	30.1	25.5	29.25	20
19.6333	26.31	30.1	25.5	29.25	19.9
19.65	26.31	30.11	25.49	29.24	20
19.6667	26.32	30.11	25.49	29.24	19.9
19.6833	26.33	30.11	25.48	29.24	19.9
19.7	26.33	30.11	25.48	29.24	20.1
19.7167	26.34	30.11	25.49	29.24	20
19.7333	26.34	30.11	25.49	29.24	20
19.75	26.34	30.12	25.49	29.24	20.1
19.7667	26.35	30.12	25.5	29.24	20
19.7833	26.35	30.12	25.49	29.24	20.1
19.8	26.36	30.12	25.49	29.24	20
19.8167	26.36	30.12	25.49	29.24	19.9
19.8333	26.37	30.12	25.49	29.24	20
19.85	26.37	30.12	25.49	29.24	20.1
19.8667	26.37	30.12	25.5	29.24	19.9
19.8833	26.38	30.12	25.5	29.24	20
19.9	26.38	30.12	25.5	29.24	20.1
19.9167	26.38	30.12	25.51	29.25	20
19.9333	26.38	30.12	25.51	29.25	19.9
19.95	26.38	30.12	25.51	29.25	20.1
19.9667	26.38	30.12	25.52	29.26	20.1
19.9833	26.37	30.11	25.52	29.26	20.1
20	26.38	30.11	25.52	29.25	19.9
20.0167	26.38	30.11	25.53	29.26	20
20.0333	26.38	30.11	25.53	29.26	20.1
20.05	26.38	30.11	25.53	29.26	20
20.0667	26.38	30.11	25.53	29.26	20
20.0833	26.38	30.11	25.53	29.26	20
20.1	26.38	30.11	25.53	29.26	20.1
20.1167	26.38	30.11	25.53	29.26	20.1
20.1333	26.37	30.11	25.53	29.26	20
20.15	26.37	30.11	25.54	29.26	20.1
20.1667	26.37	30.11	25.54	29.27	20
20.1833	26.36	30.11	25.54	29.27	20
20.2	26.36	30.11	25.54	29.27	19.9
20.2167	26.36	30.11	25.54	29.27	19.9
20.2333	26.36	30.11	25.54	29.27	19.9
20.25	26.36	30.11	25.55	29.28	20
20.2667	26.37	30.12	25.55	29.28	20
20.2833	26.38	30.12	25.55	29.29	20.1
20.3	26.38	30.13	25.56	29.3	19.9
20.3167	26.38	30.14	25.56	29.31	20
20.3333	26.39	30.14	25.56	29.31	19.9
20.35	26.39	30.15	25.57	29.33	20
20.3667	26.39	30.15	25.57	29.33	20
20.3833	26.39	30.16	25.57	29.34	20.1
20.4	26.39	30.16	25.57	29.35	19.9
20.4167	26.39	30.17	25.58	29.36	20.1
20.4333	26.39	30.18	25.59	29.38	20
20.45	26.39	30.18	25.59	29.39	20
20.4667	26.39	30.19	25.6	29.41	20.1
20.4833	26.4	30.19	25.6	29.42	19.9
20.5	26.4	30.2	25.61	29.43	20
20.5167	26.4	30.2	25.61	29.44	19.9
20.5333	26.41	30.2	25.62	29.46	20
20.55	26.42	30.21	25.62	29.47	20.1
20.5667	26.43	30.21	25.63	29.48	20
20.5833	26.43	30.22	25.64	29.5	19.9
20.6	26.44	30.22	25.64	29.51	20.1
20.6167	26.44	30.22	25.65	29.52	20
20.6333	26.44	30.22	25.66	29.53	20.2
20.65	26.44	30.22	25.66	29.53	20
20.6667	26.44	30.22	25.67	29.54	19.9
20.6833	26.44	30.22	25.68	29.54	20
20.7	26.44	30.22	25.69	29.55	20.1
20.7167	26.45	30.22	25.7	29.57	20.2
20.7333	26.45	30.22	25.7	29.57	19.9
20.75	26.45	30.22	25.71	29.58	20
20.7667	26.45	30.22	25.72	29.58	20.1
20.7833	26.45	30.22	25.73	29.59	20
20.8	26.46	30.22	25.74	29.59	20
20.8167	26.46	30.23	25.74	29.6	20.1
20.8333	26.46	30.23	25.75	29.6	20.1
20.85	26.46	30.22	25.76	29.61	20.1
20.8667	26.46	30.23	25.77	29.61	19.9
20.8833	26.46	30.23	25.77	29.62	20
20.9	26.46	30.23	25.78	29.63	20
20.9167	26.46	30.24	25.79	29.64	20.1
20.9333	26.46	30.24	25.79	29.64	20
20.95	26.46	30.24	25.8	29.65	19.9
20.9667	26.46	30.24	25.81	29.66	19.9
20.9833	26.45	30.24	25.82	29.67	20.1
21	26.45	30.24	25.82	29.68	19.9
21.0167	26.46	30.24	25.83	29.69	20.1
21.0333	26.46	30.24	25.84	29.7	20
21.05	26.47	30.25	25.84	29.7	20
21.0667	26.47	30.25	25.84	29.7	20.1
21.0833	26.47	30.26	25.84	29.7	20
21.1	26.48	30.26	25.84	29.7	19.9
21.1167	26.48	30.27	25.85	29.7	20
21.1333	26.48	30.27	25.85	29.7	20.1
21.15	26.48	30.27	25.84	29.7	20
21.1667	26.48	30.27	25.84	29.71	19.9
21.1833	26.49	30.28	25.84	29.71	20
21.2	26.49	30.28	25.84	29.71	19.9
21.2167	26.49	30.28	25.84	29.72	20.1
21.2333	26.49	30.28	25.84	29.72	20
21.25	26.49	30.29	25.84	29.71	20
21.2667	26.49	30.29	25.84	29.71	20
21.2833	26.5	30.29	25.84	29.7	19.9
21.3	26.5	30.3	25.84	29.7	20
21.3167	26.5	30.3	25.84	29.7	19.9
21.3333	26.5	30.31	25.84	29.69	19.9
21.35	26.5	30.31	25.84	29.69	20
21.3667	26.5	30.31	25.84	29.68	20
21.3833	26.5	30.32	25.83	29.68	20
21.4	26.5	30.32	25.83	29.68	20
21.4167	26.5	30.32	25.83	29.69	20
21.4333	26.51	30.32	25.84	29.69	20
21.45	26.51	30.32	25.84	29.69	20.1
21.4667	26.52	30.33	25.84	29.7	20.1
21.4833	26.52	30.33	25.84	29.7	20.1
21.5	26.53	30.33	25.84	29.7	19.9
21.5167	26.53	30.33	25.84	29.69	20.1
21.5333	26.53	30.33	25.84	29.69	20.1
21.55	26.53	30.33	25.84	29.69	20
21.5667	26.53	30.33	25.84	29.68	20
21.5833	26.53	30.33	25.84	29.69	19.9
21.6	26.54	30.32	25.84	29.69	20
21.6167	26.54	30.32	25.84	29.69	20.1
21.6333	26.55	30.33	25.84	29.69	20
21.65	26.55	30.32	25.85	29.69	20
21.6667	26.56	30.32	25.85	29.69	20
21.6833	26.56	30.31	25.85	29.69	20.1
21.7	26.56	30.31	25.85	29.69	19.9
21.7167	26.57	30.31	25.85	29.69	20.1
21.7333	26.57	30.32	25.86	29.7	19.9
21.75	26.57	30.32	25.87	29.69	20.2
21.7667	26.58	30.32	25.87	29.69	20.1
21.7833	26.58	30.33	25.87	29.69	20
21.8	26.58	30.33	25.87	29.69	19.9
21.8167	26.58	30.33	25.87	29.69	19.9
21.8333	26.58	30.34	25.87	29.69	20
21.85	26.58	30.34	25.87	29.69	20.1
21.8667	26.58	30.34	25.88	29.69	20.1
21.8833	26.58	30.35	25.89	29.7	20
21.9	26.59	30.35	25.9	29.7	19.9
21.9167	26.6	30.36	25.9	29.7	20
21.9333	26.6	30.36	25.91	29.7	19.9
21.95	26.61	30.37	25.91	29.71	20.1
21.9667	26.61	30.37	25.91	29.71	20.1
21.9833	26.61	30.37	25.9	29.71	20
22	26.61	30.38	25.91	29.72	20.1
22.0167	26.62	30.38	25.91	29.72	20
22.0333	26.63	30.39	25.91	29.72	19.9
22.05	26.63	30.39	25.92	29.72	20
22.0667	26.63	30.4	25.92	29.72	19.9
22.0833	26.63	30.4	25.91	29.72	19.9
22.1	26.64	30.4	25.91	29.72	20
22.1167	26.64	30.4	25.91	29.72	20
22.1333	26.65	30.4	25.9	29.72	19.9
22.15	26.65	30.4	25.88	29.71	20
22.1667	26.66	30.4	25.86	29.7	20
22.1833	26.66	30.4	25.84	29.68	20
22.2	26.67	30.4	25.81	29.67	20.2
22.2167	26.67	30.41	25.78	29.65	20
22.2333	26.68	30.41	25.74	29.64	20.1
22.25	26.68	30.41	25.71	29.62	20.1
22.2667	26.68	30.41	25.68	29.6	19.9
22.2833	26.68	30.41	25.66	29.58	20
22.3	26.68	30.41	25.64	29.56	20
22.3167	26.68	30.42	25.61	29.54	20.1
22.3333	26.69	30.42	25.59	29.53	20
22.35	26.69	30.42	25.57	29.52	19.9
22.3667	26.69	30.43	25.54	29.5	20.1
22.3833	26.7	30.43	25.53	29.49	20
22.4	26.7	30.43	25.52	29.48	20.1
22.4167	26.7	30.43	25.52	29.47	19.9
22.4333	26.7	30.43	25.51	29.47	19.9
22.45	26.7	30.43	25.51	29.47	20
22.4667	26.7	30.43	25.52	29.46	19.9
22.4833	26.7	30.43	25.53	29.46	19.9
22.5	26.7	30.43	25.54	29.47	19.9
22.5167	26.7	30.43	25.57	29.49	19.9
22.5333	26.7	30.43	25.6	29.51	20
22.55	26.71	30.44	25.63	29.53	20.1
22.5667	26.71	30.44	25.66	29.54	19.9
22.5833	26.71	30.44	25.7	29.56	20.2
22.6	26.71	30.44	25.73	29.59	20
22.6167	26.71	30.44	25.76	29.6	20.1
22.6333	26.71	30.44	25.78	29.61	19.9
22.65	26.71	30.44	25.81	29.63	20
22.6667	26.71	30.44	25.84	29.64	20.2
22.6833	26.71	30.43	25.86	29.66	20.1
22.7	26.72	30.44	25.89	29.68	20
22.7167	26.71	30.43	25.91	29.7	19.9
22.7333	26.71	30.43	25.93	29.71	20.1
22.75	26.7	30.43	25.93	29.71	20
22.7667	26.7	30.43	25.94	29.72	20
22.7833	26.71	30.42	25.94	29.73	20
22.8	26.71	30.42	25.95	29.74	20
22.8167	26.71	30.43	25.95	29.74	19.9
22.8333	26.72	30.43	25.95	29.74	20
22.85	26.72	30.44	25.95	29.74	20
22.8667	26.72	30.44	25.95	29.74	19.9
22.8833	26.72	30.44	25.94	29.74	20.1
22.9	26.72	30.44	25.94	29.73	20
22.9167	26.72	30.43	25.94	29.73	19.9
22.9333	26.73	30.44	25.94	29.73	19.9
22.95	26.73	30.45	25.94	29.73	20
22.9667	26.74	30.45	25.94	29.73	20
22.9833	26.74	30.45	25.94	29.73	20.1
23	26.75	30.46	25.94	29.73	20
23.0167	26.75	30.46	25.94	29.73	20.1
23.0333	26.75	30.47	25.94	29.73	20
23.05	26.75	30.47	25.93	29.72	20
23.0667	26.76	30.47	25.93	29.72	20.1
23.1167	26.76	30.48	25.93	29.72	20
23.1333	26.77	30.49	25.93	29.72	19.9
23.15	26.78	30.49	25.93	29.71	20
23.1667	26.78	30.5	25.93	29.71	20
23.1833	26.78	30.51	25.93	29.7	20
23.2	26.79	30.51	25.92	29.7	20.1
23.2167	26.79	30.52	25.92	29.69	19.9
23.2333	26.79	30.52	25.91	29.69	20
23.25	26.8	30.53	25.91	29.69	19.8
23.2667	26.8	30.53	25.91	29.69	19.9
23.2833	26.81	30.54	25.91	29.69	19.9
23.3	26.81	30.55	25.9	29.68	19.9
23.3167	26.81	30.55	25.9	29.68	19.9
23.3333	26.81	30.55	25.89	29.67	20.1
23.35	26.82	30.56	25.89	29.67	20
23.3667	26.82	30.56	25.9	29.67	20
23.3833	26.82	30.57	25.89	29.67	20
23.4	26.82	30.57	25.9	29.67	20
23.4167	26.83	30.58	25.9	29.67	20
23.4333	26.83	30.58	25.91	29.66	20.1
23.45	26.83	30.59	25.91	29.66	20
23.4667	26.83	30.59	25.9	29.65	19.9
23.4833	26.83	30.58	25.91	29.65	19.9
23.5	26.83	30.59	25.91	29.65	19.9
23.5167	26.83	30.59	25.91	29.65	19.8
23.5333	26.84	30.6	25.91	29.65	20
23.55	26.84	30.6	25.91	29.65	20.1
23.5667	26.84	30.6	25.9	29.64	19.9
23.5833	26.84	30.6	25.91	29.64	19.9
23.6	26.85	30.6	25.91	29.64	20
23.6167	26.85	30.61	25.9	29.64	19.9
23.6333	26.85	30.61	25.9	29.64	19.9
23.65	26.86	30.61	25.9	29.64	20
23.6667	26.86	30.61	25.9	29.64	20.1
23.6833	26.86	30.62	25.9	29.64	20
23.7	26.86	30.62	25.89	29.64	20
23.7167	26.86	30.63	25.89	29.63	19.9
23.7333	26.86	30.63	25.89	29.63	20
23.75	26.87	30.64	25.89	29.63	20
23.7667	26.87	30.64	25.88	29.63	20.1
23.7833	26.87	30.64	25.88	29.64	20
23.8	26.87	30.64	25.88	29.64	20
23.8167	26.88	30.65	25.88	29.64	19.9
23.8333	26.88	30.66	25.88	29.65	20
23.85	26.88	30.66	25.88	29.65	20
23.8667	26.88	30.66	25.88	29.65	19.9
23.8833	26.88	30.66	25.88	29.65	20
23.9	26.88	30.66	25.88	29.65	20
23.9167	26.88	30.66	25.89	29.66	20
23.9333	26.88	30.66	25.89	29.66	20
23.95	26.87	30.66	25.89	29.66	20
23.9667	26.87	30.65	25.89	29.66	20
23.9833	26.86	30.65	25.89	29.66	20.1
24	26.86	30.65	25.89	29.67	20
24.0167	26.86	30.66	25.89	29.67	19.9
24.0333	26.86	30.65	25.89	29.67	19.9
24.05	26.86	30.65	25.89	29.67	20
24.0667	26.86	30.64	25.89	29.67	19.9
24.0833	26.86	30.64	25.88	29.67	20.1
24.1	26.86	30.64	25.88	29.67	20
24.1167	26.86	30.64	25.88	29.67	19.8
24.1333	26.87	30.64	25.88	29.67	19.9
24.15	26.87	30.65	25.89	29.68	20.1
24.1667	26.87	30.65	25.89	29.68	20
24.1833	26.87	30.64	25.89	29.68	19.9
24.2	26.87	30.65	25.88	29.68	20
24.2167	26.88	30.65	25.88	29.68	19.9
24.2333	26.88	30.65	25.87	29.67	20
24.25	26.88	30.65	25.87	29.67	20
24.2667	26.89	30.66	25.87	29.67	19.9
24.2833	26.89	30.66	25.86	29.66	20
24.3	26.9	30.67	25.86	29.66	20
24.3167	26.9	30.67	25.86	29.66	19.9
24.3333	26.9	30.68	25.86	29.66	20
24.35	26.91	30.68	25.86	29.66	19.9
24.3667	26.91	30.68	25.87	29.66	20.1
24.3833	26.92	30.69	25.87	29.66	20
24.4	26.92	30.7	25.88	29.67	20
24.4167	26.92	30.7	25.88	29.67	20.2
24.4333	26.92	30.7	25.88	29.68	19.9
24.45	26.92	30.71	25.89	29.68	19.9
24.4667	26.93	30.71	25.89	29.69	20.1
24.4833	26.93	30.72	25.88	29.69	20
24.5	26.93	30.72	25.88	29.68	19.9
24.5167	26.94	30.73	25.88	29.68	20.1
24.5333	26.94	30.73	25.88	29.69	19.9
24.55	26.94	30.74	25.89	29.69	20
24.5667	26.94	30.74	25.89	29.69	19.9
24.5833	26.94	30.74	25.9	29.7	20.1
24.6	26.94	30.74	25.9	29.7	19.9
24.6167	26.94	30.74	25.9	29.71	20
24.6333	26.94	30.75	25.91	29.71	20.1
24.65	26.94	30.75	25.91	29.71	20.2
24.6667	26.95	30.75	25.92	29.72	19.9
24.6833	26.95	30.76	25.92	29.72	20
24.7	26.96	30.76	25.93	29.73	19.9
24.7167	26.96	30.77	25.93	29.73	20.2
24.7333	26.96	30.77	25.93	29.73	19.9
24.75	26.97	30.77	25.93	29.74	20.1
24.7667	26.97	30.77	25.94	29.74	19.9
24.7833	26.97	30.78	25.94	29.74	20
24.8	26.97	30.78	25.94	29.74	20
24.8167	26.97	30.78	25.94	29.74	20.1
24.8333	26.98	30.78	25.95	29.74	20
24.85	26.98	30.78	25.95	29.74	19.9
24.8667	26.98	30.79	25.96	29.75	20.1
24.8833	26.98	30.79	25.96	29.75	19.9
24.9	26.99	30.79	25.95	29.75	19.9
24.9167	26.99	30.8	25.95	29.75	19.9
24.9333	26.99	30.8	25.95	29.75	20.1
24.95	27	30.8	25.95	29.75	20.2
24.9667	27	30.8	25.96	29.75	20
24.9833	27	30.8	25.96	29.76	20
25	27	30.8	25.95	29.76	20.1
25.0167	27	30.8	25.95	29.76	20
25.0333	27	30.8	25.95	29.76	20
25.05	27.01	30.8	25.95	29.76	20
25.0667	27.01	30.8	25.95	29.76	20
25.0833	27.02	30.81	25.96	29.77	20
25.1	27.02	30.81	25.95	29.76	20
25.1167	27.02	30.82	25.95	29.76	19.9
25.1333	27.03	30.82	25.95	29.76	19.9
25.15	27.04	30.83	25.95	29.75	20.1
25.1667	27.04	30.83	25.94	29.75	20
25.1833	27.05	30.84	25.94	29.74	20.1
25.2	27.05	30.84	25.94	29.74	20
25.2167	27.06	30.85	25.94	29.74	20
25.2333	27.06	30.85	25.94	29.74	20.2
25.25	27.06	30.85	25.94	29.74	20.1
25.2667	27.06	30.85	25.95	29.74	20
25.2833	27.07	30.85	25.95	29.74	20.1
25.3	27.06	30.85	25.95	29.74	20
25.3167	27.08	30.87	25.95	29.75	20.1
25.3333	27.08	30.88	25.95	29.75	19.9
25.35	27.08	30.88	25.95	29.75	20
25.3667	27.08	30.89	25.95	29.75	20
25.3833	27.07	30.89	25.95	29.75	20
25.4	27.07	30.89	25.95	29.75	20
25.4167	27.07	30.89	25.95	29.75	20
25.4333	27.07	30.89	25.95	29.75	20.2
25.45	27.07	30.89	25.95	29.75	20
25.4667	27.07	30.89	25.95	29.75	20
25.4833	27.07	30.89	25.95	29.76	19.9
25.5	27.07	30.89	25.95	29.76	20
25.5167	27.07	30.89	25.96	29.77	20
25.5333	27.07	30.89	25.96	29.77	20.1
25.55	27.07	30.88	25.96	29.77	19.9
25.5667	27.06	30.88	25.96	29.78	19.9
25.5833	27.07	30.89	25.97	29.78	20.1
25.6	27.07	30.89	25.97	29.78	20
25.6167	27.08	30.9	25.97	29.79	19.9
25.6333	27.08	30.9	25.98	29.79	19.9
25.65	27.08	30.9	25.98	29.79	20
25.6667	27.07	30.89	25.99	29.79	20.1
25.6833	27.07	30.88	25.99	29.8	20
25.7	27.07	30.88	25.99	29.8	20
25.7167	27.08	30.88	25.99	29.8	19.9
25.7333	27.08	30.89	25.99	29.8	20
25.75	27.08	30.89	25.99	29.8	19.9
25.7667	27.08	30.89	25.99	29.79	20.1
25.7833	27.09	30.89	25.99	29.79	20
25.8	27.09	30.89	25.99	29.79	20
25.8167	27.09	30.89	25.99	29.79	20
25.8333	27.09	30.89	25.99	29.8	19.9
25.85	27.09	30.89	25.99	29.8	19.9
25.8667	27.09	30.89	26	29.8	19.9
25.8833	27.09	30.89	26	29.8	20.1
25.9	27.09	30.89	26.01	29.81	20.1
25.9167	27.09	30.89	26.01	29.81	20
25.9333	27.09	30.9	26.01	29.82	20
25.95	27.09	30.9	26.02	29.81	20
25.9667	27.09	30.9	26.02	29.81	19.9
25.9833	27.09	30.9	26.01	29.81	19.9
26	27.1	30.9	26.01	29.81	20.1
26.0167	27.1	30.91	26	29.81	20.1
26.0333	27.1	30.91	26	29.8	20
26.05	27.11	30.92	26.01	29.8	20.1
26.0667	27.11	30.92	26.01	29.8	20
26.0833	27.12	30.92	26.01	29.8	20
26.1	27.12	30.93	26.01	29.8	20
26.1167	27.12	30.93	26.01	29.8	20.1
26.1333	27.12	30.93	26.01	29.8	20
26.15	27.13	30.94	26.01	29.8	20
26.1667	27.14	30.95	26.01	29.81	20.1
26.1833	27.14	30.96	26.01	29.8	20.1
26.2	27.15	30.96	26.01	29.8	20
26.2167	27.15	30.96	26	29.8	19.9
26.2333	27.15	30.96	26	29.81	20
26.25	27.15	30.96	26	29.81	19.9
26.2667	27.15	30.96	26	29.81	19.9
26.2833	27.16	30.96	26	29.81	20.1
26.3	27.16	30.96	25.99	29.81	19.9
26.3167	27.17	30.97	25.99	29.81	20.1
26.3333	27.17	30.97	25.99	29.81	20.1
26.35	27.18	30.97	25.99	29.81	20
26.3667	27.18	30.97	26	29.81	20.1
26.3833	27.18	30.96	26	29.82	19.9
26.4	27.17	30.95	26	29.82	20
26.4167	27.17	30.95	26.01	29.83	20
26.4333	27.17	30.94	26.01	29.84	20
26.45	27.18	30.94	26.02	29.84	19.9
26.4667	27.17	30.93	26.02	29.84	19.9
26.4833	27.17	30.93	26.02	29.84	20
26.5	27.16	30.91	26.02	29.85	20.1
26.5167	27.15	30.9	26.03	29.84	19.9
26.5333	27.15	30.9	26.03	29.84	20.1
26.55	27.16	30.9	26.04	29.85	20.1
26.5667	27.16	30.9	26.04	29.84	20
26.5833	27.16	30.9	26.03	29.84	20
26.6	27.17	30.9	26.03	29.84	20
26.6167	27.16	30.9	26.03	29.84	19.9
26.6333	27.16	30.9	26.02	29.84	20
26.65	27.16	30.9	26.03	29.84	20.1
26.6667	27.15	30.89	26.02	29.84	19.9
26.6833	27.15	30.89	26.03	29.84	20
26.7	27.15	30.89	26.03	29.84	20
26.7167	27.14	30.89	26.04	29.84	20
26.7333	27.14	30.89	26.04	29.84	20.1
26.75	27.14	30.89	26.04	29.84	20
26.7667	27.14	30.9	26.04	29.84	20.1
26.7833	27.15	30.9	26.04	29.84	20
26.8	27.15	30.9	26.04	29.84	20.2
26.8167	27.15	30.9	26.04	29.84	20.1
26.8333	27.16	30.91	26.04	29.84	19.9
26.85	27.16	30.92	26.04	29.84	19.9
26.8667	27.17	30.93	26.04	29.85	20.1
26.8833	27.17	30.93	26.04	29.85	20
26.9	27.16	30.93	26.04	29.85	20.1
26.9167	27.17	30.93	26.05	29.86	20
26.9333	27.17	30.94	26.06	29.87	20
26.95	27.17	30.94	26.07	29.87	20
26.9667	27.17	30.94	26.08	29.87	19.9
26.9833	27.18	30.95	26.09	29.88	20.1
27	27.19	30.95	26.09	29.88	20.2
27.0167	27.19	30.96	26.1	29.89	19.9
27.0333	27.19	30.96	26.11	29.89	20
27.05	27.2	30.97	26.11	29.89	20
27.0667	27.2	30.97	26.11	29.89	19.9
27.0833	27.2	30.98	26.11	29.9	20
27.1	27.21	30.98	26.11	29.89	19.8
27.1167	27.21	30.98	26.11	29.89	20
27.1333	27.21	30.98	26.11	29.89	19.9
27.15	27.21	30.98	26.12	29.89	20
27.1667	27.21	30.98	26.13	29.9	20
27.1833	27.22	30.98	26.13	29.9	19.9
27.2	27.21	30.97	26.13	29.9	19.9
27.2167	27.21	30.97	26.13	29.89	20.1
27.2333	27.21	30.97	26.13	29.89	20
27.25	27.21	30.97	26.14	29.89	19.9
27.2667	27.22	30.97	26.13	29.89	20
27.2833	27.22	30.97	26.13	29.89	20
27.3	27.22	30.97	26.13	29.89	20
27.3167	27.22	30.97	26.13	29.89	19.9
27.3333	27.21	30.97	26.13	29.89	20.1
27.35	27.21	30.98	26.13	29.89	20
27.3667	27.22	30.98	26.13	29.89	19.8
27.3833	27.22	30.98	26.13	29.88	19.9
27.4	27.22	30.98	26.13	29.88	20.1
27.4167	27.23	30.98	26.12	29.88	20
27.4333	27.23	30.99	26.12	29.88	20
27.45	27.24	30.99	26.13	29.88	20
27.4667	27.24	31	26.13	29.89	19.9
27.4833	27.25	31.01	26.13	29.89	19.9
27.5	27.25	31.02	26.13	29.9	20
27.5167	27.25	31.02	26.13	29.9	19.9
27.5333	27.24	31.02	26.13	29.9	19.9
27.55	27.25	31.03	26.13	29.9	20.2
27.5667	27.25	31.04	26.14	29.91	19.9
27.5833	27.25	31.04	26.14	29.91	20
27.6	27.25	31.04	26.14	29.91	19.9
27.6167	27.25	31.03	26.14	29.91	20
27.6333	27.25	31.04	26.14	29.92	20
27.65	27.26	31.04	26.14	29.92	20
27.6667	27.26	31.04	26.14	29.92	20.2
27.6833	27.27	31.04	26.14	29.92	20
27.7	27.27	31.04	26.14	29.93	19.9
27.7167	27.27	31.05	26.14	29.93	20
27.7333	27.26	31.05	26.14	29.93	20
27.75	27.27	31.05	26.14	29.93	19.9
27.7667	27.27	31.05	26.15	29.94	19.9
27.7833	27.27	31.05	26.16	29.94	20.1
27.8	27.27	31.05	26.16	29.94	20
27.8167	27.26	31.05	26.17	29.94	20
27.8333	27.26	31.05	26.16	29.94	19.9
27.85	27.26	31.04	26.16	29.94	20
27.8667	27.25	31.04	26.16	29.94	20
27.8833	27.26	31.04	26.17	29.94	20
27.9	27.26	31.03	26.17	29.94	20.1
27.9167	27.26	31.03	26.17	29.94	20
27.9333	27.26	31.03	26.17	29.94	20.1
27.95	27.27	31.04	26.17	29.94	20
27.9667	27.27	31.04	26.17	29.94	20
27.9833	27.27	31.04	26.17	29.94	20.1
28	27.27	31.05	26.17	29.94	20
28.0167	27.27	31.05	26.16	29.94	20
28.0333	27.27	31.04	26.16	29.94	20.1
28.05	27.26	31.03	26.16	29.94	20
28.0667	27.25	31.02	26.16	29.94	19.9
28.0833	27.25	31.01	26.17	29.95	20
28.1	27.24	31	26.17	29.96	20
28.1167	27.23	30.99	26.17	29.96	20
28.1333	27.23	30.98	26.16	29.96	20
28.15	27.22	30.97	26.16	29.96	19.9
28.1667	27.22	30.96	26.15	29.96	20
28.1833	27.22	30.95	26.16	29.96	20
28.2	27.23	30.95	26.16	29.96	20
28.2167	27.23	30.94	26.16	29.96	20
28.2333	27.23	30.93	26.16	29.97	20
28.25	27.23	30.93	26.16	29.97	19.9
28.2667	27.23	30.93	26.16	29.97	20.1
28.2833	27.23	30.92	26.16	29.96	19.9
28.3	27.22	30.91	26.16	29.96	19.9
28.3167	27.22	30.9	26.16	29.96	19.9
28.3333	27.21	30.9	26.16	29.95	20
28.35	27.21	30.89	26.17	29.95	19.9
28.3667	27.2	30.87	26.17	29.96	20.1
28.3833	27.2	30.87	26.17	29.96	20.1
28.4	27.19	30.86	26.17	29.95	19.9
28.4167	27.19	30.86	26.17	29.95	20
28.4333	27.19	30.87	26.17	29.95	20
28.45	27.2	30.87	26.16	29.94	20
28.4667	27.2	30.88	26.16	29.94	19.9
28.4833	27.2	30.88	26.16	29.94	20.1
28.5	27.2	30.88	26.16	29.94	20
28.5167	27.2	30.88	26.16	29.94	20.1
28.5333	27.2	30.89	26.16	29.94	19.9
28.55	27.19	30.89	26.15	29.94	20
28.5667	27.19	30.89	26.15	29.93	20
28.5833	27.19	30.89	26.15	29.93	19.9
28.6	27.19	30.89	26.15	29.93	20
28.6167	27.18	30.89	26.15	29.92	20
28.6333	27.17	30.89	26.15	29.92	20
28.65	27.18	30.9	26.14	29.92	20
28.6667	27.18	30.9	26.14	29.92	20
28.6833	27.18	30.9	26.14	29.92	20
28.7	27.18	30.9	26.14	29.92	20
28.7167	27.18	30.91	26.14	29.92	20.1
28.7333	27.19	30.91	26.14	29.91	19.9
28.75	27.19	30.92	26.15	29.91	19.9
28.7667	27.2	30.93	26.15	29.92	20
28.7833	27.2	30.93	26.14	29.92	19.9
28.8	27.2	30.94	26.15	29.92	19.9
28.8167	27.2	30.94	26.15	29.92	20.1
28.8333	27.21	30.95	26.15	29.92	20
28.85	27.21	30.95	26.15	29.92	20
28.8667	27.21	30.95	26.15	29.92	20
28.8833	27.21	30.95	26.15	29.92	20.1
28.9	27.21	30.95	26.15	29.92	20
28.9167	27.21	30.96	26.16	29.92	19.9
28.9333	27.21	30.96	26.16	29.91	20.1
28.95	27.22	30.97	26.16	29.91	20.1
28.9667	27.22	30.97	26.15	29.91	19.9
28.9833	27.23	30.98	26.15	29.91	20.1
29	27.23	30.98	26.15	29.91	20.1
29.0167	27.23	30.98	26.14	29.91	20
29.0333	27.24	30.98	26.14	29.91	20
29.05	27.24	30.99	26.14	29.91	20
29.0667	27.25	30.99	26.14	29.91	20
29.0833	27.25	31	26.14	29.91	20.1
29.1	27.26	31	26.14	29.91	20
29.1167	27.26	31	26.14	29.91	20
29.1333	27.27	31	26.14	29.91	20
29.15	27.27	31	26.14	29.91	19.9
29.1667	27.27	31	26.14	29.91	20
29.1833	27.27	31	26.13	29.91	19.9
29.2	27.27	31	26.13	29.91	20
29.2167	27.27	31	26.13	29.91	19.9
29.2333	27.27	31	26.13	29.91	20
29.25	27.27	31	26.13	29.92	20.1
29.2667	27.28	31	26.13	29.92	19.9
29.2833	27.28	31	26.13	29.92	20
29.3	27.28	31	26.13	29.92	20
29.3167	27.28	31	26.14	29.92	19.9
29.3333	27.27	31	26.14	29.92	20.1
29.35	27.27	31	26.14	29.93	20
29.3667	27.28	31	26.15	29.93	20
29.3833	27.28	31	26.15	29.94	19.9
29.4	27.28	31	26.15	29.94	20
29.4167	27.28	31	26.15	29.94	20
29.4333	27.28	31	26.15	29.94	20.1
29.45	27.28	31	26.16	29.94	20
29.4667	27.28	31	26.16	29.94	20.1
29.4833	27.28	31	26.16	29.94	20.1
29.5	27.28	31	26.16	29.94	20.1
29.5167	27.28	31	26.16	29.94	20
29.5333	27.28	31	26.17	29.94	20
29.55	27.29	31	26.17	29.94	19.9
29.5667	27.29	31	26.17	29.94	20
29.5833	27.29	31	26.17	29.94	19.9
29.6	27.3	31	26.17	29.94	20
29.6167	27.3	31	26.17	29.94	20.1
29.6333	27.3	31	26.17	29.95	20
29.65	27.29	31	26.17	29.95	19.9
29.6667	27.29	30.99	26.17	29.96	20
29.6833	27.3	30.99	26.17	29.96	20
29.7	27.3	30.99	26.17	29.96	19.9
29.7167	27.3	30.99	26.17	29.96	20
29.7333	27.3	30.99	26.17	29.96	20.2
29.75	27.3	30.99	26.17	29.96	20
29.7667	27.3	30.98	26.17	29.96	20.1
29.7833	27.3	30.98	26.17	29.96	20
29.8	27.3	30.98	26.17	29.96	20
29.8167	27.3	30.98	26.17	29.96	19.9
29.8333	27.3	30.98	26.17	29.96	20.1
29.85	27.3	30.98	26.17	29.96	20
29.8667	27.3	30.98	26.17	29.97	20
29.8833	27.3	30.99	26.17	29.97	19.9
29.9	27.3	30.99	26.17	29.97	20.1
29.9167	27.3	30.98	26.17	29.97	19.9
29.9333	27.3	30.98	26.18	29.97	20.1
29.95	27.29	30.98	26.18	29.97	19.9
29.9667	27.29	30.98	26.18	29.98	20.1
29.9833	27.29	30.99	26.18	29.98	20
30	27.3	30.99	26.18	29.98	20
30.0167	27.29	31	26.18	29.98	20
30.0333	27.29	31	26.18	29.99	20
30.05	27.3	31	26.19	30	20
30.0667	27.3	31	26.19	30	20
30.0833	27.3	31	26.2	30.01	20
30.1	27.3	31	26.2	30.01	20.1
30.1167	27.3	31	26.21	30.02	20
30.1333	27.3	31	26.21	30.02	20.1
30.15	27.3	31	26.22	30.03	20
30.1667	27.3	31	26.22	30.03	20.1
30.1833	27.3	31	26.22	30.04	20.1
30.2	27.3	31	26.23	30.04	20.1
30.2167	27.3	31	26.23	30.04	19.9
30.2333	27.3	31	26.23	30.03	19.9
30.25	27.3	31	26.23	30.04	20
30.2667	27.3	31	26.23	30.04	20
30.2833	27.3	31	26.23	30.04	20.1
30.3	27.31	31.01	26.24	30.05	20
30.3167	27.31	31.01	26.24	30.05	20
30.3333	27.31	31.01	26.24	30.06	20
30.35	27.31	31.02	26.25	30.07	20
30.3667	27.32	31.02	26.25	30.07	20.1
30.3833	27.32	31.03	26.25	30.07	20.1
30.4	27.32	31.03	26.25	30.07	19.9
30.4167	27.32	31.03	26.25	30.07	19.9
30.4333	27.32	31.03	26.25	30.07	20.1
30.45	27.33	31.04	26.25	30.07	20.1
30.4667	27.33	31.04	26.25	30.07	20
30.4833	27.33	31.04	26.24	30.07	19.9
30.5	27.33	31.04	26.24	30.07	19.9
30.5167	27.33	31.04	26.25	30.07	19.9
30.5333	27.34	31.05	26.25	30.07	20
30.55	27.34	31.05	26.25	30.07	20
30.5667	27.34	31.05	26.25	30.07	20.1
30.5833	27.33	31.05	26.25	30.08	20
30.6	27.33	31.05	26.25	30.08	19.9
30.6167	27.33	31.05	26.25	30.08	20.1
30.6333	27.33	31.05	26.25	30.08	20
30.65	27.33	31.05	26.25	30.08	20
30.6667	27.33	31.04	26.25	30.08	20.1
30.6833	27.33	31.05	26.26	30.08	19.9
30.7	27.33	31.05	26.26	30.07	20.1
30.7167	27.33	31.05	26.26	30.07	20
30.7333	27.33	31.05	26.26	30.07	20
30.75	27.33	31.05	26.26	30.07	19.9
30.7667	27.33	31.05	26.26	30.07	19.9
30.7833	27.33	31.05	26.26	30.07	20
30.8	27.32	31.04	26.26	30.07	19.9
30.8167	27.32	31.04	26.27	30.07	19.8
30.8333	27.32	31.04	26.27	30.07	20.1
30.85	27.32	31.04	26.27	30.07	19.9
30.8667	27.33	31.05	26.27	30.07	19.9
30.8833	27.32	31.05	26.27	30.07	20
30.9	27.32	31.05	26.27	30.07	20
30.9167	27.32	31.05	26.27	30.07	20
30.9333	27.32	31.05	26.27	30.07	19.9
30.95	27.32	31.05	26.28	30.07	20.1
30.9667	27.32	31.06	26.28	30.07	20.1
30.9833	27.32	31.06	26.27	30.07	19.9
31	27.33	31.07	26.27	30.07	20.1
31.0167	27.33	31.07	26.27	30.07	20
31.0333	27.34	31.07	26.26	30.06	20
31.05	27.34	31.06	26.26	30.06	20
31.0667	27.33	31.06	26.26	30.06	20
31.0833	27.33	31.06	26.26	30.06	20.1
31.1	27.34	31.06	26.26	30.06	20
31.1167	27.34	31.05	26.26	30.06	19.9
31.1333	27.34	31.06	26.26	30.06	19.9
31.15	27.34	31.06	26.26	30.06	20
31.1667	27.34	31.06	26.26	30.06	20.1
31.1833	27.34	31.06	26.26	30.06	19.9
31.2	27.34	31.06	26.26	30.06	20.1
31.2167	27.34	31.05	26.26	30.06	19.9
31.2333	27.34	31.05	26.26	30.06	19.9
31.25	27.34	31.05	26.26	30.06	20
31.2667	27.34	31.05	26.27	30.07	19.9
31.2833	27.34	31.05	26.27	30.07	20
31.3	27.34	31.04	26.27	30.07	20
31.3167	27.34	31.04	26.27	30.07	20
31.3333	27.34	31.04	26.28	30.07	19.9
31.35	27.34	31.04	26.28	30.07	20
31.3667	27.34	31.04	26.29	30.07	20.1
31.3833	27.34	31.04	26.29	30.08	20.1
31.4	27.34	31.05	26.29	30.08	20.1
31.4167	27.34	31.05	26.29	30.08	20
31.4333	27.34	31.05	26.28	30.07	19.9
31.45	27.34	31.06	26.28	30.07	19.9
31.4667	27.34	31.06	26.28	30.06	19.9
31.4833	27.34	31.06	26.28	30.06	20
31.5	27.34	31.06	26.28	30.06	20.1
31.5167	27.35	31.07	26.28	30.06	19.9
31.5333	27.35	31.07	26.28	30.06	20.1
31.55	27.36	31.08	26.28	30.06	19.9
31.5667	27.36	31.09	26.28	30.06	20
31.5833	27.36	31.09	26.28	30.05	20.1
31.6	27.36	31.09	26.28	30.05	19.9
31.6167	27.37	31.09	26.27	30.05	19.9
31.6333	27.37	31.09	26.27	30.05	19.9
31.65	27.37	31.1	26.27	30.05	19.9
31.6667	27.38	31.1	26.27	30.04	20.1
31.6833	27.38	31.1	26.26	30.04	20.1
31.7	27.38	31.1	26.26	30.04	19.9
31.7167	27.38	31.1	26.25	30.03	20.1
31.7333	27.38	31.1	26.24	30.03	19.9
31.75	27.38	31.1	26.24	30.03	20
31.7667	27.38	31.1	26.24	30.03	19.9
31.7833	27.39	31.11	26.25	30.03	20.2
31.8	27.4	31.11	26.24	30.03	20.1
31.8167	27.41	31.11	26.24	30.03	19.9
31.8333	27.41	31.12	26.24	30.02	20
31.85	27.42	31.12	26.24	30.02	20.1
31.8667	27.42	31.13	26.24	30.02	19.9
31.8833	27.43	31.13	26.24	30.02	19.9
31.9	27.43	31.13	26.24	30.01	20
31.9167	27.43	31.13	26.24	30.01	20
31.9333	27.43	31.13	26.23	30.01	20.1
31.95	27.43	31.14	26.23	30.01	20
31.9667	27.43	31.14	26.23	30	20
31.9833	27.44	31.14	26.23	30	19.9
32	27.44	31.14	26.23	30	20.1
32.0167	27.44	31.14	26.23	30	19.9
32.0333	27.44	31.14	26.23	30	20.2
32.05	27.44	31.14	26.23	30	20
32.0667	27.44	31.14	26.24	30	20
32.0833	27.44	31.14	26.24	30	19.9
32.1	27.44	31.14	26.24	30	20
32.1167	27.44	31.14	26.24	30	19.9
32.1333	27.44	31.14	26.24	30	19.9
32.15	27.44	31.14	26.24	30	19.9
32.1667	27.43	31.13	26.24	30	20.1
32.1833	27.43	31.13	26.25	30	20.1
32.2	27.43	31.13	26.25	30.01	19.9
32.2167	27.43	31.12	26.25	30.01	19.9
32.2333	27.42	31.12	26.24	30	20.1
32.25	27.41	31.11	26.24	30.01	19.9
32.2667	27.41	31.11	26.24	30	19.9
32.2833	27.41	31.11	26.24	30.01	20
32.3	27.42	31.11	26.25	30.01	20
32.3167	27.42	31.11	26.25	30.02	20
32.3333	27.42	31.12	26.25	30.02	20.1
32.35	27.42	31.12	26.25	30.03	19.9
32.3667	27.42	31.12	26.25	30.03	20
32.3833	27.42	31.13	26.24	30.03	20
32.4	27.42	31.13	26.24	30.04	20
32.4167	27.42	31.13	26.24	30.04	20.1
32.4333	27.43	31.13	26.24	30.04	20.1
32.45	27.43	31.14	26.24	30.04	20.1
32.4667	27.43	31.14	26.24	30.04	20
32.4833	27.43	31.14	26.24	30.04	19.9
32.5	27.43	31.15	26.25	30.05	19.8
32.5167	27.43	31.16	26.25	30.06	20
32.5333	27.43	31.17	26.25	30.06	19.9
32.55	27.43	31.17	26.25	30.06	20.1
32.5667	27.43	31.17	26.26	30.07	20
32.5833	27.44	31.18	26.27	30.08	20.1
32.6	27.45	31.18	26.27	30.09	20
32.6167	27.45	31.19	26.28	30.1	19.9
32.6333	27.46	31.19	26.28	30.1	20
32.65	27.45	31.19	26.28	30.1	20.1
32.6667	27.46	31.2	26.29	30.1	20
32.6833	27.46	31.2	26.29	30.11	20
32.7	27.46	31.2	26.3	30.11	20.1
32.7167	27.47	31.2	26.3	30.12	20.1
32.7333	27.47	31.2	26.31	30.12	19.9
32.75	27.48	31.2	26.31	30.13	20
32.7667	27.48	31.2	26.32	30.13	20
32.7833	27.48	31.2	26.32	30.13	20.1
32.8	27.48	31.2	26.33	30.14	20.1
32.8167	27.48	31.2	26.33	30.14	20
32.8333	27.49	31.2	26.34	30.14	19.9
32.85	27.49	31.2	26.34	30.14	20.1
32.8667	27.49	31.2	26.34	30.15	20.1
32.8833	27.49	31.2	26.34	30.15	19.8
32.9	27.49	31.2	26.35	30.15	19.9
32.9167	27.49	31.2	26.35	30.15	19.9
32.9333	27.49	31.2	26.35	30.15	20
32.95	27.49	31.2	26.35	30.15	20.1
32.9667	27.49	31.2	26.35	30.15	20.1
32.9833	27.49	31.2	26.35	30.16	20.2
33	27.5	31.2	26.36	30.16	20
33.0167	27.5	31.2	26.36	30.17	20
33.0333	27.5	31.2	26.36	30.17	20.1
33.05	27.5	31.2	26.37	30.17	20.1
33.0667	27.5	31.2	26.37	30.17	20.1
33.0833	27.5	31.2	26.37	30.17	20
33.1	27.49	31.2	26.37	30.17	19.9
33.1167	27.49	31.2	26.37	30.17	19.9
33.1333	27.49	31.2	26.37	30.18	20.1
33.15	27.5	31.2	26.37	30.18	20.1
33.1667	27.5	31.2	26.37	30.18	20.1
33.1833	27.49	31.2	26.38	30.18	20
33.2	27.49	31.2	26.38	30.18	19.9
33.2167	27.49	31.2	26.38	30.19	20
33.2333	27.49	31.2	26.39	30.19	20.1
33.25	27.49	31.2	26.39	30.2	20.1
33.2667	27.49	31.21	26.39	30.2	20.1
33.2833	27.5	31.21	26.39	30.21	19.9
33.3	27.5	31.22	26.39	30.21	20.1
[truncated: 3,760 more rows]

## Sheet: Fig.5
	Temperature [C]
	1st TRT								2nd TRT
	Inlet				Outlet				Inlet				Outlet
Z [m]	t=0	t=1	t=24	t=60	t=0	t=1	t=24	t=60	t=0	t=1	t=24	t=60	t=0	t=1	t=24	t=60
0	12.43	22.17	31.22	33.73	12.3	18.44	27.82	29.78	12.56	21.39	29.62	31.43	12.43	17.99	26.22	27.48
0.5	12.4	22.16	31.24	33.68	12.3	18.4	27.52	29.53	12.43	21.38	29.64	31.38	12.34	17.75	25.92	27.23
1	12.36	22.11	31.2	33.59	12.29	18.38	27.51	29.55	12.39	21.32	29.6	31.29	12.31	17.72	25.91	27.25
1.5	12.31	22.07	31.13	33.51	12.24	18.32	27.43	29.54	12.35	21.27	29.53	31.21	12.29	17.64	25.83	27.24
2	12.25	22	31.07	33.44	12.19	18.28	27.38	29.54	12.37	21.24	29.47	31.14	12.3	17.6	25.78	27.24
2.5	12.2	21.94	31.02	33.41	12.13	18.26	27.34	29.5	12.22	21.2	29.42	31.11	12.15	17.56	25.74	27.2
3	12.15	21.9	30.99	33.42	12.09	18.25	27.29	29.44	12.27	21.17	29.39	31.12	12.21	17.52	25.69	27.14
3.5	12.12	21.86	30.95	33.42	12.07	18.24	27.26	29.38	12.2	21.12	29.35	31.12	12.16	17.5	25.66	27.08
4	12.12	21.82	30.9	33.4	12.07	18.21	27.27	29.34	12.31	21.06	29.3	31.1	12.26	17.48	25.67	27.04
4.5	12.14	21.77	30.86	33.35	12.07	18.17	27.28	29.31	12.32	21.01	29.26	31.05	12.25	17.46	25.68	27.01
5	12.16	21.71	30.82	33.28	12.06	18.14	27.28	29.33	12.19	20.96	29.22	30.98	12.1	17.47	25.68	27.03
5.5	12.16	21.69	30.8	33.23	12.04	18.13	27.31	29.34	12.25	20.93	29.2	30.93	12.13	17.48	25.71	27.04
6	12.15	21.71	30.81	33.23	12.01	18.16	27.33	29.34	12.21	20.93	29.21	30.93	12.07	17.5	25.73	27.04
6.5	12.16	21.73	30.81	33.27	12	18.2	27.34	29.36	12.18	20.96	29.21	30.97	12.02	17.52	25.74	27.06
7	12.18	21.74	30.84	33.3	12.01	18.23	27.38	29.38	12.36	21.02	29.24	31	12.19	17.56	25.78	27.08
7.5	12.2	21.75	30.9	33.34	12.03	18.27	27.42	29.4	12.29	21.08	29.3	31.04	12.12	17.58	25.82	27.1
8	12.21	21.75	30.95	33.36	12.04	18.3	27.44	29.43	12.4	21.12	29.35	31.06	12.24	17.59	25.84	27.13
8.5	12.19	21.74	30.97	33.37	12.05	18.31	27.44	29.47	12.26	21.13	29.37	31.07	12.12	17.59	25.84	27.17
9	12.16	21.7	30.97	33.36	12.04	18.33	27.44	29.5	12.21	21.09	29.37	31.06	12.1	17.6	25.84	27.2
9.5	12.12	21.65	30.92	33.35	12.03	18.34	27.43	29.54	12.16	21.02	29.32	31.05	12.08	17.62	25.83	27.24
10	12.1	21.61	30.88	33.34	12.03	18.33	27.43	29.57	12.2	20.97	29.28	31.04	12.13	17.64	25.83	27.27
10.5	12.09	21.6	30.86	33.32	12.04	18.33	27.47	29.59	12.1	20.93	29.26	31.02	12.05	17.64	25.87	27.29
11	12.09	21.61	30.85	33.28	12.06	18.33	27.51	29.6	12.25	20.9	29.25	30.98	12.22	17.66	25.91	27.3
11.5	12.1	21.64	30.85	33.24	12.05	18.34	27.55	29.6	12.15	20.89	29.25	30.94	12.11	17.66	25.95	27.3
12	12.11	21.67	30.85	33.22	12.05	18.35	27.58	29.62	12.11	20.88	29.25	30.92	12.05	17.66	25.98	27.32
12.5	12.12	21.68	30.86	33.21	12.04	18.35	27.6	29.62	12.21	20.87	29.26	30.91	12.13	17.67	26	27.32
13	12.12	21.68	30.86	33.23	12.01	18.35	27.59	29.61	12.17	20.88	29.26	30.93	12.06	17.67	25.99	27.31
13.5	12.13	21.68	30.86	33.25	12	18.36	27.59	29.6	12.16	20.89	29.26	30.95	12.03	17.66	25.99	27.3
14	12.14	21.68	30.86	33.28	12.01	18.36	27.59	29.61	12.21	20.9	29.26	30.98	12.07	17.65	25.99	27.31
14.5	12.15	21.66	30.86	33.29	12.02	18.39	27.6	29.62	12.29	20.92	29.26	30.99	12.16	17.66	26	27.32
15	12.16	21.64	30.83	33.28	12.04	18.43	27.62	29.64	12.27	20.91	29.23	30.98	12.15	17.66	26.02	27.34
15.5	12.11	21.62	30.8	33.27	12.07	18.45	27.65	29.67	12.26	20.89	29.2	30.97	12.22	17.69	26.05	27.37
16	12.11	21.6	30.79	33.23	12.09	18.48	27.67	29.69	12.15	20.87	29.19	30.93	12.14	17.72	26.07	27.39
16.5	12.09	21.57	30.77	33.19	12.1	18.5	27.67	29.71	12.13	20.84	29.17	30.89	12.14	17.74	26.07	27.41
17	12.08	21.54	30.77	33.17	12.1	18.48	27.65	29.71	12.15	20.82	29.17	30.87	12.17	17.75	26.05	27.41
17.5	12.07	21.49	30.75	33.15	12.08	18.45	27.63	29.69	12.09	20.8	29.15	30.85	12.09	17.75	26.03	27.39
18	12.06	21.43	30.71	33.13	12.03	18.41	27.61	29.67	12.16	20.78	29.11	30.83	12.14	17.74	26.01	27.37
18.5	12.04	21.41	30.69	33.12	12	18.38	27.62	29.66	12.08	20.76	29.09	30.82	12.03	17.73	26.02	27.36
19	12.04	21.42	30.67	33.1	11.98	18.37	27.63	29.67	12.16	20.76	29.07	30.8	12.1	17.76	26.03	27.37
19.5	12.05	21.43	30.68	33.08	11.98	18.39	27.66	29.72	12.24	20.77	29.08	30.78	12.18	17.79	26.06	27.42
20	12.07	21.42	30.71	33.09	12.01	18.46	27.69	29.78	12.08	20.79	29.11	30.79	12.02	17.82	26.09	27.48
20.5	12.08	21.42	30.7	33.1	12.04	18.54	27.71	29.83	12.13	20.77	29.1	30.8	12.08	17.86	26.11	27.53
21	12.09	21.42	30.69	33.1	12.05	18.59	27.73	29.86	12.11	20.74	29.09	30.8	12.07	17.89	26.13	27.56
21.5	12.09	21.43	30.67	33.1	12.06	18.6	27.75	29.87	12.1	20.72	29.07	30.8	12.07	17.9	26.15	27.57
22	12.1	21.42	30.64	33.09	12.07	18.57	27.76	29.84	12.12	20.71	29.04	30.79	12.09	17.92	26.16	27.54
22.5	12.11	21.4	30.63	33.06	12.06	18.54	27.76	29.81	12.13	20.7	29.03	30.76	12.08	17.9	26.16	27.51
23	12.11	21.36	30.6	33.03	12.04	18.54	27.77	29.8	12.15	20.7	29	30.73	12.08	17.88	26.17	27.5
23.5	12.1	21.34	30.58	33.02	12.02	18.56	27.77	29.8	12.2	20.68	28.98	30.72	12.13	17.86	26.17	27.5
24	12.08	21.33	30.58	32.99	12.02	18.59	27.79	29.81	12.1	20.66	28.98	30.69	12.04	17.86	26.19	27.51
24.5	12.09	21.33	30.58	32.98	12.02	18.62	27.82	29.84	12.17	20.64	28.98	30.68	12.11	17.9	26.22	27.54
25	12.08	21.33	30.58	32.97	12.02	18.63	27.83	29.86	12.27	20.62	28.98	30.67	12.22	17.93	26.23	27.56
25.5	12.06	21.32	30.58	32.98	12.03	18.63	27.83	29.88	12.23	20.64	28.98	30.68	12.2	17.94	26.23	27.58
26	12.05	21.31	30.55	32.97	12.05	18.63	27.83	29.9	12.06	20.65	28.95	30.67	12.06	17.96	26.23	27.6
26.5	12.04	21.3	30.51	32.93	12.06	18.63	27.83	29.91	12.14	20.64	28.91	30.63	12.17	17.97	26.23	27.61
27	12.04	21.26	30.47	32.89	12.08	18.62	27.83	29.89	12.16	20.61	28.87	30.59	12.2	17.97	26.23	27.59
27.5	12.07	21.21	30.43	32.83	12.08	18.63	27.84	29.88	12.08	20.55	28.83	30.53	12.09	17.98	26.24	27.58
28	12.08	21.18	30.39	32.78	12.07	18.65	27.86	29.89	12.14	20.49	28.79	30.48	12.13	18	26.26	27.59
28.5	12.09	21.16	30.38	32.77	12.06	18.67	27.88	29.92	12.19	20.46	28.78	30.47	12.16	18.01	26.28	27.62
29	12.09	21.16	30.36	32.8	12.05	18.69	27.9	29.97	12.24	20.44	28.76	30.5	12.19	18.02	26.3	27.67
29.5	12.09	21.16	30.36	32.81	12.05	18.72	27.94	30.01	12.24	20.42	28.76	30.51	12.21	18.03	26.34	27.71
30	12.09	21.13	30.37	32.82	12.05	18.72	27.96	30.02	12.19	20.44	28.77	30.52	12.15	18.02	26.36	27.72
30.5	12.09	21.08	30.37	32.82	12.05	18.73	27.96	30.02	12.13	20.45	28.77	30.52	12.09	18.02	26.36	27.72
31	12.07	21.02	30.36	32.8	12.08	18.75	27.99	30.01	12.21	20.45	28.76	30.5	12.21	18.04	26.39	27.71
31.5	12.07	21	30.36	32.78	12.1	18.77	28	30.01	12.11	20.45	28.76	30.48	12.14	18.05	26.4	27.71
32	12.07	21.01	30.32	32.77	12.1	18.76	27.98	29.99	12.18	20.43	28.72	30.47	12.2	18.06	26.38	27.69
32.5	12.07	21.03	30.28	32.74	12.08	18.74	27.97	29.97	12.26	20.39	28.68	30.44	12.27	18.05	26.37	27.67
33	12.08	21.04	30.23	32.73	12.06	18.72	27.98	29.96	12.09	20.37	28.63	30.43	12.07	18.04	26.38	27.66
33.5	12.07	21.03	30.19	32.72	12.03	18.74	28.01	29.98	12.18	20.35	28.59	30.42	12.14	18.04	26.41	27.68
34	12.06	21.01	30.18	32.69	12.02	18.77	28.05	30.01	12.15	20.31	28.58	30.39	12.11	18.06	26.45	27.71
34.5	12.05	20.97	30.17	32.66	12.03	18.79	28.06	30.03	12.12	20.28	28.57	30.36	12.09	18.09	26.46	27.73
35	12.04	20.93	30.15	32.62	12.02	18.8	28.05	30.03	12.2	20.25	28.55	30.32	12.18	18.12	26.45	27.73
35.5	12.02	20.89	30.14	32.58	12.01	18.77	28.03	30	12.05	20.22	28.54	30.28	12.04	18.13	26.43	27.7
36	12.01	20.85	30.12	32.53	12.02	18.75	28.01	29.99	12.07	20.2	28.52	30.23	12.08	18.12	26.41	27.69
36.5	11.99	20.82	30.1	32.47	12.01	18.75	28.01	30.01	12.19	20.18	28.5	30.17	12.21	18.11	26.41	27.71
37	12.01	20.83	30.1	32.43	12	18.76	28.02	30.03	12.1	20.16	28.5	30.13	12.09	18.11	26.42	27.73
37.5	12.04	20.83	30.08	32.43	11.99	18.75	28.01	30.07	12.18	20.15	28.48	30.13	12.13	18.13	26.41	27.77
38	12.06	20.85	30.08	32.48	12	18.79	28.02	30.11	12.19	20.16	28.48	30.18	12.13	18.15	26.42	27.81
38.5	12.07	20.88	30.09	32.55	12.01	18.84	28.06	30.13	12.22	20.21	28.49	30.25	12.17	18.17	26.46	27.83
39	12.06	20.88	30.1	32.6	12.04	18.88	28.09	30.15	12.07	20.24	28.5	30.3	12.05	18.19	26.49	27.85
39.5	12.05	20.88	30.1	32.62	12.05	18.9	28.09	30.17	12.05	20.26	28.5	30.32	12.06	18.2	26.49	27.87
40	12.05	20.87	30.11	32.61	12.05	18.89	28.08	30.19	12.14	20.25	28.51	30.31	12.14	18.21	26.48	27.89
40.5	12.07	20.87	30.12	32.57	12.06	18.88	28.07	30.21	12.16	20.2	28.52	30.27	12.16	18.24	26.47	27.91
41	12.09	20.86	30.13	32.54	12.09	18.89	28.09	30.23	12.12	20.18	28.53	30.24	12.12	18.26	26.49	27.93
41.5	12.12	20.86	30.14	32.52	12.11	18.9	28.13	30.23	12.25	20.17	28.54	30.22	12.23	18.26	26.53	27.93
42	12.14	20.85	30.13	32.51	12.12	18.9	28.13	30.22	12.15	20.17	28.53	30.21	12.13	18.24	26.53	27.92
42.5	12.16	20.81	30.09	32.51	12.12	18.88	28.11	30.21	12.35	20.16	28.49	30.21	12.32	18.23	26.51	27.91
43	12.15	20.77	30.02	32.47	12.11	18.84	28.09	30.19	12.17	20.13	28.42	30.17	12.13	18.22	26.49	27.89
43.5	12.13	20.74	29.97	32.4	12.09	18.83	28.07	30.17	12.3	20.07	28.37	30.1	12.26	18.23	26.47	27.87
44	12.12	20.72	29.93	32.35	12.08	18.85	28.07	30.15	12.17	20.03	28.33	30.05	12.12	18.24	26.47	27.85
44.5	12.11	20.71	29.92	32.32	12.07	18.87	28.08	30.16	12.22	20.02	28.32	30.02	12.18	18.23	26.48	27.86
45	12.12	20.68	29.91	32.29	12.07	18.88	28.07	30.17	12.2	19.99	28.31	29.99	12.14	18.21	26.47	27.87
45.5	12.15	20.64	29.88	32.27	12.06	18.89	28.08	30.19	12.21	19.98	28.28	29.97	12.13	18.21	26.48	27.89
46	12.16	20.6	29.83	32.24	12.06	18.92	28.11	30.23	12.24	19.97	28.23	29.94	12.14	18.24	26.51	27.93
46.5	12.17	20.57	29.77	32.2	12.07	18.94	28.16	30.25	12.29	19.92	28.17	29.9	12.18	18.29	26.56	27.95
47	12.18	20.55	29.74	32.16	12.08	18.96	28.18	30.25	12.19	19.87	28.14	29.86	12.09	18.31	26.58	27.95
47.5	12.18	20.54	29.77	32.15	12.09	18.96	28.19	30.26	12.28	19.83	28.17	29.85	12.19	18.32	26.59	27.96
48	12.14	20.51	29.8	32.15	12.09	18.96	28.19	30.26	12.32	19.8	28.2	29.85	12.27	18.31	26.59	27.96
48.5	12.11	20.49	29.82	32.17	12.06	18.96	28.18	30.26	12.23	19.8	28.22	29.87	12.19	18.29	26.58	27.96
49	12.09	20.48	29.82	32.17	12.04	18.98	28.16	30.28	12.13	19.84	28.22	29.87	12.08	18.31	26.56	27.98
49.5	12.08	20.46	29.8	32.16	12.03	19.03	28.16	30.32	12.1	19.85	28.2	29.86	12.04	18.33	26.56	28.02
50	12.09	20.42	29.77	32.15	12.04	19.07	28.17	30.34	12.27	19.83	28.17	29.85	12.22	18.34	26.57	28.04
50.5	12.11	20.39	29.74	32.13	12.06	19.08	28.18	30.35	12.2	19.79	28.14	29.83	12.15	18.36	26.58	28.05
51	12.12	20.37	29.72	32.12	12.07	19.09	28.22	30.36	12.32	19.75	28.12	29.82	12.27	18.37	26.62	28.06
51.5	12.11	20.37	29.67	32.1	12.07	19.11	28.27	30.38	12.14	19.74	28.07	29.8	12.1	18.37	26.67	28.08
52	12.12	20.37	29.62	32.08	12.05	19.11	28.29	30.39	12.31	19.75	28.02	29.78	12.25	18.39	26.69	28.09
52.5	12.12	20.38	29.6	32.06	12.05	19.12	28.29	30.39	12.3	19.75	28	29.76	12.22	18.42	26.69	28.09
53	12.1	20.35	29.57	32.04	12.04	19.12	28.27	30.38	12.19	19.71	27.97	29.74	12.13	18.43	26.67	28.08
53.5	12.08	20.31	29.56	32.01	12.04	19.11	28.24	30.36	12.13	19.66	27.96	29.71	12.09	18.41	26.64	28.06
54	12.06	20.27	29.55	31.98	12.05	19.12	28.25	30.35	12.14	19.61	27.95	29.68	12.13	18.39	26.65	28.05
54.5	12.05	20.24	29.54	31.95	12.05	19.13	28.28	30.35	12.14	19.57	27.94	29.65	12.13	18.37	26.68	28.05
55	12.06	20.22	29.53	31.94	12.03	19.12	28.32	30.37	12.07	19.56	27.93	29.64	12.05	18.38	26.72	28.07
55.5	12.07	20.23	29.52	31.94	12.02	19.13	28.34	30.39	12.26	19.58	27.92	29.64	12.21	18.41	26.74	28.09
56	12.08	20.25	29.49	31.93	12.02	19.15	28.36	30.41	12.11	19.57	27.89	29.63	12.05	18.45	26.76	28.11
56.5	12.07	20.25	29.46	31.9	12.02	19.16	28.36	30.42	12.09	19.54	27.86	29.6	12.05	18.47	26.76	28.12
57	12.05	20.2	29.43	31.85	12.03	19.16	28.36	30.41	12.08	19.51	27.83	29.55	12.06	18.48	26.76	28.11
57.5	12.03	20.17	29.41	31.82	12.03	19.17	28.37	30.41	12.16	19.48	27.81	29.52	12.15	18.5	26.77	28.11
58	12.04	20.18	29.41	31.82	12.03	19.17	28.38	30.41	12.17	19.49	27.81	29.52	12.15	18.53	26.78	28.11
58.5	12.08	20.21	29.44	31.84	12.02	19.19	28.4	30.43	12.2	19.52	27.84	29.54	12.13	18.56	26.8	28.13
59	12.12	20.25	29.45	31.87	12.02	19.23	28.43	30.49	12.14	19.54	27.85	29.57	12.04	18.6	26.83	28.19
59.5	12.13	20.28	29.44	31.88	12.03	19.28	28.45	30.52	12.14	19.56	27.84	29.58	12.05	18.63	26.85	28.22
60	12.13	20.27	29.44	31.87	12.05	19.32	28.48	30.53	12.17	19.57	27.84	29.57	12.09	18.64	26.88	28.23
60.5	12.11	20.26	29.45	31.86	12.06	19.35	28.49	30.55	12.18	19.57	27.85	29.56	12.14	18.67	26.89	28.25
61	12.09	20.24	29.46	31.85	12.08	19.39	28.51	30.57	12.15	19.56	27.86	29.55	12.14	18.71	26.91	28.27
61.5	12.1	20.23	29.44	31.85	12.09	19.43	28.57	30.6	12.26	19.53	27.84	29.55	12.26	18.74	26.97	28.3
62	12.11	20.21	29.43	31.85	12.09	19.46	28.59	30.62	12.31	19.5	27.83	29.55	12.28	18.76	26.99	28.32
62.5	12.11	20.18	29.41	31.83	12.07	19.45	28.58	30.61	12.18	19.49	27.81	29.53	12.14	18.74	26.98	28.31
63	12.08	20.13	29.4	31.8	12.06	19.42	28.58	30.6	12.23	19.48	27.8	29.5	12.21	18.7	26.98	28.3
63.5	12.05	20.09	29.39	31.76	12.05	19.38	28.57	30.6	12.17	19.48	27.79	29.46	12.18	18.68	26.97	28.3
64	12.01	20.06	29.37	31.72	12.05	19.38	28.58	30.61	12.21	19.47	27.77	29.42	12.24	18.7	26.98	28.31
64.5	11.99	20.06	29.35	31.72	12.05	19.41	28.6	30.63	12.04	19.45	27.75	29.42	12.1	18.75	27	28.33
65	12.01	20.08	29.33	31.76	12.04	19.44	28.59	30.64	12.03	19.43	27.73	29.46	12.06	18.78	26.99	28.34
65.5	12.03	20.12	29.34	31.79	12.02	19.45	28.55	30.65	12.14	19.43	27.74	29.49	12.13	18.77	26.95	28.35
66	12.05	20.13	29.35	31.79	12	19.45	28.52	30.66	12.2	19.44	27.75	29.49	12.14	18.75	26.92	28.36
66.5	12.08	20.12	29.35	31.78	11.99	19.45	28.51	30.67	12.21	19.44	27.75	29.48	12.12	18.71	26.91	28.37
67	12.1	20.11	29.36	31.75	12.01	19.47	28.53	30.7	12.26	19.45	27.76	29.45	12.16	18.7	26.93	28.4
67.5	12.11	20.1	29.36	31.73	12.03	19.52	28.56	30.72	12.27	19.43	27.76	29.43	12.18	18.74	26.96	28.42
68	12.11	20.08	29.36	31.72	12.04	19.54	28.59	30.73	12.11	19.39	27.76	29.42	12.04	18.77	26.99	28.43
68.5	12.09	20.04	29.32	31.69	12.04	19.54	28.62	30.74	12.13	19.35	27.72	29.39	12.07	18.78	27.02	28.44
69	12.05	20	29.25	31.62	12.02	19.52	28.63	30.72	12.09	19.29	27.65	29.32	12.05	18.79	27.03	28.42
69.5	12.03	19.96	29.18	31.57	11.98	19.49	28.62	30.68	12.16	19.25	27.58	29.27	12.12	18.77	27.02	28.38
70	12.03	19.94	29.14	31.52	11.95	19.47	28.6	30.64	12.05	19.23	27.54	29.22	11.97	18.74	27	28.34
70.5	12.03	19.92	29.12	31.5	11.94	19.46	28.57	30.62	12.12	19.22	27.52	29.2	12.03	18.72	26.97	28.32
71	12.04	19.91	29.15	31.51	11.95	19.49	28.57	30.66	12.17	19.23	27.55	29.21	12.08	18.72	26.97	28.36
71.5	12.05	19.92	29.19	31.53	11.98	19.51	28.59	30.73	12.21	19.25	27.59	29.23	12.14	18.74	26.99	28.43
72	12.06	19.94	29.22	31.56	12.01	19.52	28.6	30.8	12.21	19.26	27.62	29.26	12.17	18.78	27	28.5
72.5	12.06	19.95	29.24	31.59	12.02	19.54	28.62	30.83	12.23	19.26	27.64	29.29	12.19	18.85	27.02	28.53
73	12.07	19.94	29.2	31.6	12.01	19.53	28.62	30.8	12.2	19.26	27.6	29.3	12.15	18.88	27.02	28.5
73.5	12.05	19.9	29.14	31.58	12	19.52	28.62	30.74	12.11	19.24	27.54	29.28	12.07	18.87	27.02	28.44
74	12.01	19.85	29.09	31.54	11.99	19.53	28.65	30.7	12.07	19.2	27.49	29.24	12.05	18.84	27.05	28.4
74.5	11.97	19.82	29.07	31.51	11.97	19.54	28.68	30.69	12.14	19.17	27.47	29.21	12.14	18.82	27.08	28.39
75	11.94	19.81	29.07	31.51	11.96	19.54	28.7	30.7	11.97	19.14	27.47	29.21	11.99	18.81	27.1	28.4
75.5	11.93	19.79	29.08	31.5	11.95	19.56	28.73	30.74	12.1	19.1	27.48	29.2	12.12	18.82	27.13	28.44
76	11.94	19.77	29.07	31.49	11.96	19.58	28.75	30.78	12.11	19.1	27.47	29.19	12.14	18.85	27.15	28.48
76.5	11.96	19.76	29.06	31.47	11.98	19.59	28.78	30.82	11.98	19.11	27.46	29.17	12	18.88	27.18	28.52
77	11.98	19.75	29.03	31.41	11.99	19.62	28.82	30.86	12	19.1	27.43	29.11	12	18.93	27.22	28.56
77.5	12	19.73	29.01	31.38	12.01	19.66	28.87	30.9	12	19.09	27.41	29.08	12.02	18.98	27.27	28.6
78	12.01	19.74	28.99	31.38	12.03	19.69	28.91	30.94	12.09	19.08	27.39	29.08	12.11	19.03	27.31	28.64
78.5	12.01	19.75	28.98	31.39	12.06	19.71	28.93	30.99	12.1	19.07	27.38	29.09	12.14	19.07	27.33	28.69
79	12.01	19.73	28.96	31.42	12.08	19.73	28.93	31.08	12.13	19.07	27.36	29.12	12.21	19.07	27.33	28.78
79.5	12	19.72	28.94	31.46	12.11	19.72	28.91	31.16	12.02	19.07	27.34	29.16	12.13	19.06	27.31	28.86
80	12	19.7	28.94	31.47	12.12	19.72	28.89	31.24	12.07	19.07	27.34	29.17	12.2	19.04	27.29	28.94
	#VALUE!	#VALUE!	#VALUE!	#VALUE!	0	0	0	0	0	0	0	0	#VALUE!	#VALUE!	#VALUE!	#VALUE!
	#VALUE!	#VALUE!	#VALUE!	#VALUE!	0	0	0	0	0	0	0	0	0	#VALUE!	#VALUE!	#VALUE!
	#VALUE!	#VALUE!	#VALUE!	#VALUE!	0	0	0	0	0	0	0	0	0	#VALUE!	#VALUE!	#VALUE!
	#VALUE!	#VALUE!	#VALUE!	#VALUE!	0	0	0	0	0	0	0	0	0	#VALUE!	#VALUE!	#VALUE!
	#VALUE!	#VALUE!	#VALUE!	#VALUE!	0	0	0	0	0	0	0	0	0	#VALUE!	#VALUE!	#VALUE!
	#VALUE!	#VALUE!	#VALUE!	#VALUE!	0	0	0	0	0	0	0	0	0	#VALUE!	#VALUE!	#VALUE!
	#VALUE!	#VALUE!	#VALUE!	#VALUE!	0	0	0	0	0	0	0	0	0	#VALUE!	#VALUE!	#VALUE!
	#VALUE!	#VALUE!	#VALUE!	#VALUE!	0	0	0	0	0	0	0	0	0	#VALUE!	#VALUE!	#VALUE!
	#VALUE!	#VALUE!	#VALUE!	#VALUE!	0	0	0	0	0	0	0	0	0	#VALUE!	#VALUE!	#VALUE!
	#VALUE!	#VALUE!	#VALUE!	#VALUE!	0	0	0	0	0	0	0	0	0	#VALUE!	#VALUE!	#VALUE!
	#VALUE!	#VALUE!	#VALUE!	#VALUE!	0	0	0	0	0	0	0	0	0	#VALUE!	#VALUE!	#VALUE!
	#VALUE!	#VALUE!	#VALUE!	#VALUE!	0	0	0	0	0	0	0	0	0	#VALUE!	#VALUE!	#VALUE!
	#VALUE!	#VALUE!	#VALUE!	#VALUE!	0	0	0	0	0	0	0	0	0	#VALUE!	#VALUE!	#VALUE!
	#VALUE!	#VALUE!	#VALUE!	#VALUE!	0	0	0	0	0	0	0	0	0	#VALUE!	#VALUE!	#VALUE!
	#VALUE!	#VALUE!	#VALUE!	#VALUE!	0	0	0	0	0	0	0	0	0	#VALUE!	#VALUE!	#VALUE!
	#VALUE!	#VALUE!	#VALUE!	#VALUE!	0	0	0	0	0	0	0	0	0	#VALUE!	#VALUE!	#VALUE!
	#VALUE!	#VALUE!	#VALUE!	#VALUE!	0	0	0	0	0	0	0	0	0	0	0	0
	#VALUE!	#VALUE!	#VALUE!	#VALUE!	0	0	0	0	0	0	0	0	0	0	0	0
	#VALUE!	#VALUE!	#VALUE!	#VALUE!	0	0	0	0	0	0	0	0	0	0	0	0
	#VALUE!	#VALUE!	#VALUE!	#VALUE!	0	0	0	0	0	0	0	0	0	0	0	0
	#VALUE!	#VALUE!	#VALUE!	#VALUE!	0	0	0	0	0	0	0	0	0	0	0	0
	#VALUE!	#VALUE!	#VALUE!	#VALUE!	0	0	0	0	0	0	0	0	0	0	0	0
	#VALUE!	#VALUE!	#VALUE!	#VALUE!	0	0	0	0	0	0	0	0	0	0	0	0
	#VALUE!	#VALUE!	#VALUE!	#VALUE!	0	0	0	0	0	0	0	0	0	0	0	0
	#VALUE!	#VALUE!	#VALUE!	#VALUE!	0	0	0	0	0	0	0	0	0	0	0	0
	#VALUE!	#VALUE!	#VALUE!	#VALUE!	0	0	0	0	0	0	0	0	0	0	0	0
	#VALUE!	#VALUE!	#VALUE!	#VALUE!	0	0	0	0	0	0	0	0	0	0	0	0
	#VALUE!	#VALUE!	#VALUE!	#VALUE!	0	0	0	0	0	0	0	0	0	0	0	0
	#VALUE!	#VALUE!	#VALUE!	#VALUE!	0	0	0	0	0	0	0	0	0	0	0	0
	#VALUE!	#VALUE!	#VALUE!	#VALUE!	0	0	0	0	0	0	0	0	0	0	0	0
	#VALUE!	#VALUE!	#VALUE!	#VALUE!	0	0	0	0	0	0	0	0	0	0	0	0
	#VALUE!	#VALUE!	#VALUE!	#VALUE!	0	0	0	0	0	0	0	0	0	0	0	0
	#VALUE!	#VALUE!	#VALUE!	#VALUE!	0	0	0	0	0	0	0	0	0	0	0	0
	#VALUE!	#VALUE!	#VALUE!	#VALUE!	0	0	0	0	0	0	0	0	0	0	0	0
	#VALUE!	#VALUE!	#VALUE!	#VALUE!	0	0	0	0	0	0	0	0	0	0	0	0
	#VALUE!	#VALUE!	#VALUE!	#VALUE!	0	0	0	0	0	0	0	0	0	0	0	0
	#VALUE!	#VALUE!	#VALUE!	#VALUE!	0	0	0	0	0	0	0	0	0	0	0	0
	#VALUE!	#VALUE!	#VALUE!	#VALUE!	0	0	0	0	0	0	0	0	0	0	0	0
	#VALUE!	#VALUE!	#VALUE!	#VALUE!	0	0	0	0	0	0	0	0	0	0	0	0
	#VALUE!	#VALUE!	#VALUE!	#VALUE!	0	0	0	0	0	0	0	0	0	0	0	0

## Sheet: Fig.6d
Z [m]	v [cm/s]
6	96.38
6.5	96.38
7	94.05
7.5	97.93
8	95.99
8.5	103.77
9	109.99
9.5	105.32
9.75	106.88
10	75.77
10.25	83.55
10.5	85.1
11	95.21
11.5	90.94
12	83.16
12.49	91.71
13	88.21
13.5	86.66
14	78.88
14.5	66.83
15	73.05
15.5	83.55
16	85.1
16.5	65.66
17	64.11
17.5	79.66
18	71.11
18.5	60.61
18.75	68.39
19	46.61
19.25	43.89
19.5	44.28
20	47.78
20.5	37.28
21	36.5
21.5	42.72
22	47.78
22.5	46.61
23	41.95
23.5	36.5
23.99	37.28
24.5	35.73
25	38.06
25.5	36.5
26	37.28
26.5	35.34
27	36.5
27.5	34.17
28	34.95
28.5	#VALUE!
28.5	32.62
29	33
30	32.23
31	23.67
30.5	28.34
31.5	21.73
32	18.23
33	15.9
34	15.12
35	14.34
36	14.73
37	13.56
38	14.73
39	13.18
40	13.56
41	12.4
42	11.62
43	8.51
44	8.51
45	7.73
46	8.9
47	8.51
48	6.96
49	7.34
50	9.29
51	5.01
50.49	6.18
51.25	3.46
51.5	3.07
51.74	2.42
52	2.42
52.5	2.68
53	2.68
54	2.68
55	2.68
56	3.46
57	3.46
58	3.97
59	4.23
60	3.97
61	3.2
61.5	3.2
62	3.72
63	3.46
64	3.46
65	3.2
66	3.2
68	2.68
69	2.94
70	2.68
71	2.16
72	1.64
72.5	1.12
73	0
72.75	0
74	0
75	0
78	0
45.5	0
45.99	0
46.5	0
47	0
47.5	0
48	0
48.5	0
49	0
49.5	0
50	0
50.54	0
51	0
51.5	0
52	0
52.5	0
53	0
53.5	0
54	0
54.5	0
55	0
55.5	0
55.99	0
56.5	0
57	0
57.5	0
58	0
58.5	0
59	0
59.78	0
60	0
60.5	0
61	0
61.5	0
62	0
62.5	0
63	0
63.5	0
64	0
64.5	0
65	0
65.49	0
66	0
66.5	0
67	0
68	0
69	0
69.5	0
70	0
71	0
75	0
78	0
